# Supplementary material for: Photocatalytic reduction of CO2 to CO and formate by a novel Co(ii) catalyst containing a cis-oxygen atom: photocatalysis and DFT calculations
Source: Royal Society of Chemistry journal article supplement (doi:10.1039/c8dt02148a), 2018-01-01
Supplement: c8dt02148a1.pdf [file c8dt02148a1.pdf]

Supporting Information for

**Photocatalytic reduction of CO<sub>2</sub> to CO and formate by a novel Co(II)-catalyst bearing a cis-oxygen atom: photocatalysis and DFT calculations**

**Cheng-Yi Zhu<sup>†a</sup>, Ya-Qiong Zhang<sup>†a</sup>, Rong-Zhen Liao<sup>\*a</sup>, Wu Xia<sup>a</sup>, Jun-Chao Hu<sup>a</sup>, Jin Wu<sup>a</sup>, Hongfang Liu<sup>a</sup> and Feng Wang<sup>\*ab</sup>**

a. Key Laboratory of Materials Chemistry for Energy Conversion and Storage (Huazhong University of Science and Technology) of Ministry of Education, Hubei Key Laboratory of Material Chemistry and Service Failure, School of Chemistry and Chemical Engineering, Huazhong University of Science and Technology, Wuhan, 430074, P. R. China

b. Shenzhen Huazhong University of Science and Technology Research Institute, Shenzhen, 518057, P. R. China

<sup>†</sup> These two authors contributed equally to this work.

## **Contents**

- 1. Synthesis**
- 2. UV-Vis absorption of *CI***
- 3. Photocatalysis**
- 4. Stern-Volmer equation fitting**
- 5. DFT calculations**

## 1. Synthesis

All chemicals, unless otherwise noted, were purchased from commercial sources. All solvents of analytical grade were purchased from commercial suppliers and used without further purification.

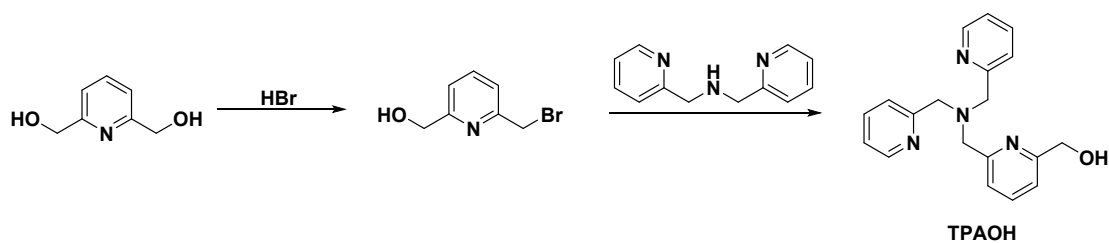

**Scheme S1.** The synthetic routes of **TPAOH** ligand

## 2. UV-Vis absorption of *CI*

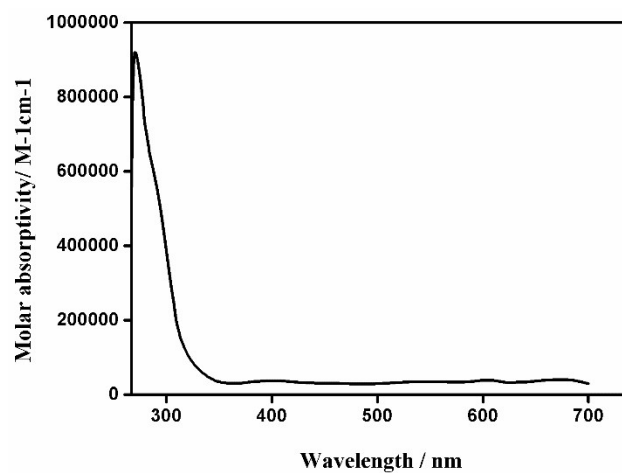

**Figure S1.** The Uv-vis absorption spectrum of *CI* ( $1.00 \times 10^{-3}$  M) in DMF at room temperature

### 3. Photocatalysis

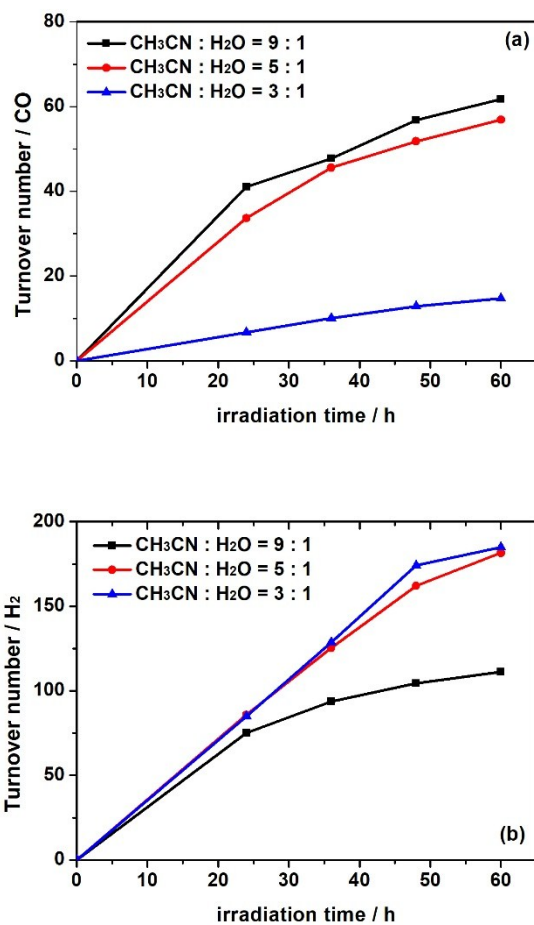

**Figure S2.** The photocatalytic CO<sub>2</sub> reduction in CH<sub>3</sub>CN/H<sub>2</sub>O mixture solution with different CH<sub>3</sub>CN/H<sub>2</sub>O ratio. The samples were irradiated under blue LED lamp ( $\lambda_{\max} = 450$  nm); the TON was calculated based on catalyst. Sample concentration:  $[CI] = 1.00 \times 10^{-5}$  M,  $[\text{Ir}(\text{ppy})_3] = 1.00 \times 10^{-4}$  M,  $v(\text{TEA}) = 1.00$  mL, total volume = 5.00 mL; sample A:  $v(\text{CH}_3\text{CN}):v(\text{H}_2\text{O}) = 9:1$ , sample B:  $v(\text{CH}_3\text{CN}):v(\text{H}_2\text{O}) = 5:1$ ,  $v(\text{CH}_3\text{CN}):v(\text{H}_2\text{O}) = 3:1$ ; irradiation time: 60 hours.

#### 4. Stern-Volmer equation fitting

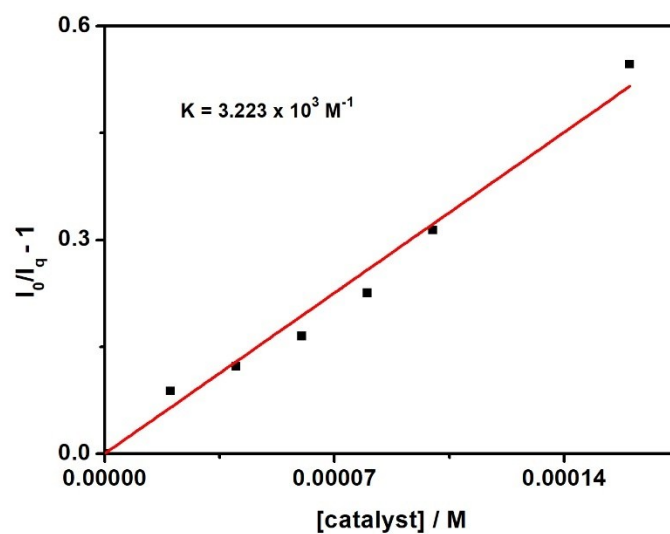

**Figure S3.** Stern-Volmer equation fitting for the emission quenching of Ir(ppy)<sub>3</sub> ( $4.00 \times 10^{-6}$  M) by *CI* (concentration range: 20  $\mu$ M - 160  $\mu$ M M) in degassed CH<sub>3</sub>CN at room temperature, excited wavelength: 400 nm.

## 5. DFT calculations

|                                                                                                                                                 |                                                                                                                                                   |                                                                                                                                                          |
|-------------------------------------------------------------------------------------------------------------------------------------------------|---------------------------------------------------------------------------------------------------------------------------------------------------|----------------------------------------------------------------------------------------------------------------------------------------------------------|
| 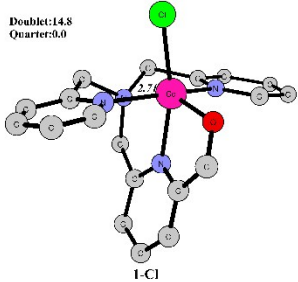 <p>Doublet:14.8<br/>Quartet:0.0</p> <p>1-Cl</p>               |  <p>Doublet:18.5<br/>Quartet:0.0</p> <p>41</p>                   |  <p>Singlet:47.3<br/>Triplet:0.0</p> <p>2dp</p> <p>32<sub>dp</sub></p> |
| $E_{\text{opt}} = -1635.9252798$                                                                                                                | $E_{\text{opt}} = -1175.5210163$                                                                                                                  | $E_{\text{opt}} = -1175.6427842$                                                                                                                         |
| Doublet is 14.8 kcal mol <sup>-1</sup> higher                                                                                                   | Doublet is 18.5 kcal mol <sup>-1</sup> higher                                                                                                     | Singlet is 47.3 kcal mol <sup>-1</sup> higher                                                                                                            |
|  <p>Singlet:31.2<br/>Triplet:0.0</p> <p>2A</p> <p>32A</p>      |  <p>Singlet:9.9<br/>Triplet:0.0</p> <p>2B</p> <p>12B</p>         |  <p>Singlet:5.2<br/>Triplet:0.0</p> <p>Int1</p> <p>3Int1</p>           |
| $E_{\text{opt}} = -1176.0917896$                                                                                                                | $E_{\text{opt}} = -1176.0760209$                                                                                                                  | $E_{\text{opt}} = -1364.683841$                                                                                                                          |
| Singlet is 31.2 kcal mol <sup>-1</sup> higher                                                                                                   | Triplet is 9.9 kcal mol <sup>-1</sup> higher                                                                                                      | Singlet is 5.2 kcal mol <sup>-1</sup> higher                                                                                                             |
|  <p>Doublet:0.0<br/>Quartet:1.7</p> <p>Int2</p> <p>2Int2</p> |  <p>Doublet:3.9<br/>Quartet:0.0</p> <p>TS-2A</p> <p>2TS-2A</p> |  <p>Doublet:8.2<br/>Quartet:0.0</p> <p>3p</p> <p>43<sub>dp</sub></p> |
| $E_{\text{opt}} = -1365.2838613$                                                                                                                | $E_{\text{opt}} = -1467.8910492$                                                                                                                  | $E_{\text{opt}} = -1176.2144031$                                                                                                                         |
| Quartet is 1.7 kcal mol <sup>-1</sup> higher                                                                                                    | Quartet is 3.9 kcal mol <sup>-1</sup> higher                                                                                                      | Doublet is 8.2 kcal mol <sup>-1</sup> higher                                                                                                             |
|  <p>Doublet:1.1<br/>Quartet:0.0</p> <p>3</p> <p>43</p>       |  <p>Doublet:3.0<br/>Quartet:0.0</p> <p>Int4</p> <p>4Int3</p>   |  <p>Doublet:1.3<br/>Quartet:0.0</p> <p>TS-HCOOH</p> <p>4TS-HCOOH</p> |
| $E_{\text{opt}} = -1176.6669379$                                                                                                                | $E_{\text{opt}} = -1467.9316799$                                                                                                                  | $E_{\text{opt}} = -1365.25932599$                                                                                                                        |
| Doublet is 1.1 kcal mol <sup>-1</sup> higher                                                                                                    | Doublet is 3.0 kcal mol <sup>-1</sup> higher                                                                                                      | Doublet is 1.3 kcal mol <sup>-1</sup> higher                                                                                                             |

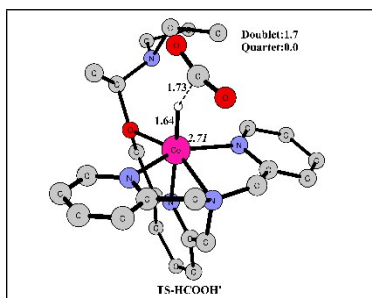

<sup>4</sup>TS-HCOOH'

$E_{\text{opt}} = -1656.51850825$

Doublet is 1.7 kcal mol<sup>-1</sup> higher

|                                                   |                                     |                                                                |
|---------------------------------------------------|-------------------------------------|----------------------------------------------------------------|
| H <sub>2</sub>                                    | CO                                  | H <sub>2</sub> O                                               |
| $E_{\text{opt}} = -1.17853938133$                 | $E_{\text{opt}} = -113.3069132$     | $E_{\text{opt}} = -76.418168$                                  |
| HCOOH                                             | HCOO <sup>-</sup>                   | CO <sub>2</sub>                                                |
| $E_{\text{opt}} = -189.751402937$                 | $E_{\text{opt}} = -189.174974174$   | $E_{\text{opt}} = -188.5777595$                                |
| Et <sub>3</sub> N                                 | Et <sub>3</sub> N <sup>+</sup>      | Et <sub>2</sub> N <sup>-</sup> CH <sub>2</sub> CH <sub>3</sub> |
| $E_{\text{opt}} = -292.4468438$                   | $E_{\text{opt}} = -292.1886762$     | $E_{\text{opt}} = -291.7906207$                                |
| Et <sub>2</sub> N <sup>+</sup> =CHCH <sub>3</sub> | Et <sub>2</sub> NCH=CH <sub>2</sub> |                                                                |
| $E_{\text{opt}} = -291.6205772$                   | $E_{\text{opt}} = -291.2191179$     |                                                                |

### (1) Cartesian coordinates for all optimized structures



1-Cl : E(opt)= -1635.9252798 hartree

| Center<br>Number | Atomic<br>Number | Atomic<br>Type | Coordinates (Angstroms) |           |           |
|------------------|------------------|----------------|-------------------------|-----------|-----------|
|                  |                  |                | X                       | Y         | Z         |
| 1                | 27               | 0              | 0.195818                | -0.422324 | -0.953280 |
| 2                | 6                | 0              | 0.063155                | 0.355800  | 2.239301  |
| 3                | 1                | 0              | -0.574347               | 0.186144  | 3.120110  |
| 4                | 1                | 0              | 1.038415                | 0.677950  | 2.623479  |
| 5                | 6                | 0              | -0.494680               | 1.506528  | 1.410742  |
| 6                | 6                | 0              | -1.084069               | 2.635657  | 1.975115  |
| 7                | 1                | 0              | -1.223375               | 2.710252  | 3.049539  |
| 8                | 6                | 0              | -1.486821               | 3.667618  | 1.119513  |
| 9                | 1                | 0              | -1.948221               | 4.562024  | 1.529191  |
| 10               | 6                | 0              | -1.297046               | 3.543403  | -0.255084 |
| 11               | 1                | 0              | -1.603327               | 4.330253  | -0.938207 |
| 12               | 6                | 0              | -0.710245               | 2.372383  | -0.748243 |
| 13               | 6                | 0              | -0.469988               | 2.043999  | -2.223671 |
| 14               | 1                | 0              | -1.474731               | 2.056200  | -2.705232 |
| 15               | 1                | 0              | 0.060874                | 2.913026  | -2.664514 |
| 16               | 6                | 0              | -0.855879               | -1.833339 | 1.573225  |
| 17               | 1                | 0              | -0.524505               | -2.761830 | 1.096372  |
| 18               | 1                | 0              | -1.128840               | -2.049182 | 2.619418  |
| 19               | 6                | 0              | -2.085595               | -1.383116 | 0.804298  |
| 20               | 6                | 0              | -3.377170               | -1.546376 | 1.306595  |
| 21               | 1                | 0              | -3.522556               | -1.941795 | 2.307145  |
| 22               | 6                | 0              | -4.466415               | -1.200539 | 0.505927  |
| 23               | 1                | 0              | -5.479775               | -1.320991 | 0.877487  |
| 24               | 6                | 0              | -4.234720               | -0.698428 | -0.773759 |
| 25               | 1                | 0              | -5.052094               | -0.419585 | -1.430001 |
| 26               | 6                | 0              | -2.914392               | -0.553192 | -1.196876 |
| 27               | 1                | 0              | -2.659115               | -0.159869 | -2.176844 |
| 28               | 6                | 0              | 1.591889                | -1.476536 | 1.619444  |
| 29               | 1                | 0              | 1.564284                | -2.449947 | 1.119109  |
| 30               | 1                | 0              | 1.882290                | -1.625662 | 2.671950  |
| 31               | 6                | 0              | 2.639407                | -0.647349 | 0.897136  |
| 32               | 6                | 0              | 3.926814                | -0.453115 | 1.397947  |
| 33               | 1                | 0              | 4.201101                | -0.861628 | 2.365920  |
| 34               | 6                | 0              | 4.846284                | 0.266937  | 0.632876  |
| 35               | 1                | 0              | 5.856068                | 0.427197  | 0.999528  |
| 36               | 6                | 0              | 4.449602                | 0.782799  | -0.600505 |
| 37               | 1                | 0              | 5.133902                | 1.350494  | -1.222033 |
| 38               | 6                | 0              | 3.139095                | 0.559124  | -1.022714 |
| 39               | 1                | 0              | 2.736719                | 0.939449  | -1.958293 |

|    |    |   |           |           |           |
|----|----|---|-----------|-----------|-----------|
| 40 | 7  | 0 | 0.256397  | -0.883555 | 1.473125  |
| 41 | 7  | 0 | -0.330165 | 1.403096  | 0.089931  |
| 42 | 7  | 0 | -1.873095 | -0.884713 | -0.426685 |
| 43 | 7  | 0 | 2.267762  | -0.141600 | -0.289570 |
| 44 | 8  | 0 | 0.207969  | 0.861984  | -2.415371 |
| 45 | 17 | 0 | 0.614398  | -2.715398 | -1.418694 |

-----  
**1** : E(opt)= -1175.52101632 hartree  
 -----

| Center<br>Number | Atomic<br>Number | Atomic<br>Type | Coordinates (Angstroms) |           |           |
|------------------|------------------|----------------|-------------------------|-----------|-----------|
|                  |                  |                | X                       | Y         | Z         |
| 1                | 27               | 0              | -0.009874               | -0.065349 | -0.787240 |
| 2                | 6                | 0              | -1.063078               | 0.060064  | 2.155909  |
| 3                | 1                | 0              | -1.020708               | -0.252564 | 3.208524  |
| 4                | 1                | 0              | -1.510446               | 1.060495  | 2.138459  |
| 5                | 6                | 0              | -1.959678               | -0.860223 | 1.341493  |
| 6                | 6                | 0              | -3.054979               | -1.556442 | 1.832081  |
| 7                | 1                | 0              | -3.296878               | -1.540762 | 2.889692  |
| 8                | 6                | 0              | -3.845476               | -2.271381 | 0.918102  |
| 9                | 1                | 0              | -4.709610               | -2.824484 | 1.273236  |
| 10               | 6                | 0              | -3.529508               | -2.270293 | -0.438367 |
| 11               | 1                | 0              | -4.137894               | -2.811535 | -1.155820 |
| 12               | 6                | 0              | -2.401601               | -1.559333 | -0.864591 |
| 13               | 6                | 0              | -1.893216               | -1.440007 | -2.299985 |
| 14               | 1                | 0              | -1.721930               | -2.466406 | -2.672932 |
| 15               | 1                | 0              | -2.726155               | -1.039194 | -2.905753 |
| 16               | 6                | 0              | 1.163057                | -0.952902 | 1.912020  |
| 17               | 1                | 0              | 1.636149                | -0.817571 | 2.895682  |
| 18               | 1                | 0              | 0.535728                | -1.849637 | 1.978780  |
| 19               | 6                | 0              | 2.212242                | -1.204294 | 0.845777  |
| 20               | 6                | 0              | 3.467681                | -1.729450 | 1.141703  |
| 21               | 1                | 0              | 3.749917                | -1.910108 | 2.173850  |
| 22               | 6                | 0              | 4.344402                | -2.022249 | 0.095407  |
| 23               | 1                | 0              | 5.327274                | -2.432495 | 0.304521  |
| 24               | 6                | 0              | 3.940564                | -1.783422 | -1.218152 |
| 25               | 1                | 0              | 4.588269                | -2.004152 | -2.058940 |
| 26               | 6                | 0              | 2.674912                | -1.247379 | -1.436387 |
| 27               | 1                | 0              | 2.295034                | -1.046906 | -2.433530 |
| 28               | 6                | 0              | 0.907548                | 1.486857  | 1.717562  |
| 29               | 1                | 0              | 1.979692                | 1.369953  | 1.520801  |
| 30               | 1                | 0              | 0.811920                | 1.874895  | 2.741737  |
| 31               | 6                | 0              | 0.358569                | 2.486950  | 0.716168  |
| 32               | 6                | 0              | 0.249364                | 3.845742  | 1.000726  |

|    |   |   |           |           |           |
|----|---|---|-----------|-----------|-----------|
| 33 | 1 | 0 | 0.514023  | 4.215839  | 1.985934  |
| 34 | 6 | 0 | -0.200791 | 4.714568  | 0.004720  |
| 35 | 1 | 0 | -0.291066 | 5.777226  | 0.206494  |
| 36 | 6 | 0 | -0.540167 | 4.198902  | -1.245844 |
| 37 | 1 | 0 | -0.899411 | 4.838584  | -2.043935 |
| 38 | 6 | 0 | -0.420447 | 2.827816  | -1.453258 |
| 39 | 1 | 0 | -0.687984 | 2.356293  | -2.394127 |
| 40 | 7 | 0 | 0.282185  | 0.166945  | 1.552923  |
| 41 | 7 | 0 | -1.659941 | -0.896164 | 0.033519  |
| 42 | 7 | 0 | 1.836015  | -0.956331 | -0.425993 |
| 43 | 7 | 0 | 0.023169  | 1.993920  | -0.495162 |
| 44 | 8 | 0 | -0.749467 | -0.654098 | -2.425589 |

-----  
 $2_{dp}$  : E(opt)= -1175.6427842 hartree  
 -----

| Center<br>Number | Atomic<br>Number | Atomic<br>Type | Coordinates (Angstroms) |           |           |
|------------------|------------------|----------------|-------------------------|-----------|-----------|
|                  |                  |                | X                       | Y         | Z         |
| 1                | 27               | 0              | 0.345252                | 0.059135  | -0.904819 |
| 2                | 6                | 0              | 0.272343                | -0.593411 | 2.143239  |
| 3                | 1                | 0              | -0.093181               | -1.155440 | 3.016911  |
| 4                | 1                | 0              | 1.264017                | -0.197396 | 2.401566  |
| 5                | 6                | 0              | -0.624964               | 0.595083  | 1.854724  |
| 6                | 6                | 0              | -1.470938               | 1.208086  | 2.773893  |
| 7                | 1                | 0              | -1.597159               | 0.795851  | 3.770322  |
| 8                | 6                | 0              | -2.152622               | 2.365088  | 2.376073  |
| 9                | 1                | 0              | -2.822431               | 2.862780  | 3.071829  |
| 10               | 6                | 0              | -1.980163               | 2.873225  | 1.086804  |
| 11               | 1                | 0              | -2.512150               | 3.760958  | 0.757895  |
| 12               | 6                | 0              | -1.120997               | 2.202618  | 0.209968  |
| 13               | 6                | 0              | -0.855075               | 2.567812  | -1.256321 |
| 14               | 1                | 0              | -1.858843               | 2.624866  | -1.732363 |
| 15               | 1                | 0              | -0.477059               | 3.610907  | -1.260813 |
| 16               | 6                | 0              | -0.632379               | -2.419033 | 0.738350  |
| 17               | 1                | 0              | -0.206647               | -3.246074 | 0.152675  |
| 18               | 1                | 0              | -1.015982               | -2.849525 | 1.676295  |
| 19               | 6                | 0              | -1.756014               | -1.816257 | -0.064307 |
| 20               | 6                | 0              | -3.097578               | -2.085957 | 0.190526  |
| 21               | 1                | 0              | -3.364101               | -2.688465 | 1.054696  |
| 22               | 6                | 0              | -4.079313               | -1.589620 | -0.667090 |
| 23               | 1                | 0              | -5.129828               | -1.791570 | -0.485083 |
| 24               | 6                | 0              | -3.670716               | -0.815527 | -1.769288 |
| 25               | 1                | 0              | -4.393247               | -0.401409 | -2.464778 |
| 26               | 6                | 0              | -2.322489               | -0.567088 | -1.954005 |

|    |   |   |           |           |           |
|----|---|---|-----------|-----------|-----------|
| 27 | 1 | 0 | -1.951912 | 0.070166  | -2.750948 |
| 28 | 6 | 0 | 1.828284  | -2.016324 | 0.842149  |
| 29 | 1 | 0 | 1.754777  | -2.834077 | 0.112433  |
| 30 | 1 | 0 | 2.209614  | -2.444465 | 1.781931  |
| 31 | 6 | 0 | 2.780232  | -0.982608 | 0.304888  |
| 32 | 6 | 0 | 4.044449  | -0.769565 | 0.842706  |
| 33 | 1 | 0 | 4.349599  | -1.337752 | 1.717363  |
| 34 | 6 | 0 | 4.908052  | 0.156594  | 0.253210  |
| 35 | 1 | 0 | 5.899681  | 0.329345  | 0.657981  |
| 36 | 6 | 0 | 4.448013  | 0.866622  | -0.871605 |
| 37 | 1 | 0 | 5.073299  | 1.602768  | -1.366096 |
| 38 | 6 | 0 | 3.173682  | 0.623309  | -1.349962 |
| 39 | 1 | 0 | 2.759779  | 1.171481  | -2.190161 |
| 40 | 7 | 0 | 0.463333  | -1.461928 | 0.968414  |
| 41 | 7 | 0 | -0.476760 | 1.104861  | 0.621052  |
| 42 | 7 | 0 | -1.362219 | -1.049088 | -1.123822 |
| 43 | 7 | 0 | 2.332254  | -0.292212 | -0.794731 |
| 44 | 8 | 0 | -0.007142 | 1.698836  | -1.911454 |

-----  
**2A** : E(opt)= -1176.0917896 hartree  
 -----

| Center<br>Number | Atomic<br>Number | Atomic<br>Type | Coordinates (Angstroms) |           |           |
|------------------|------------------|----------------|-------------------------|-----------|-----------|
|                  |                  |                | X                       | Y         | Z         |
| 1                | 27               | 0              | 0.347952                | -0.021340 | -0.853350 |
| 2                | 6                | 0              | 0.256608                | -0.730605 | 2.029347  |
| 3                | 1                | 0              | -0.153999               | -1.353110 | 2.836598  |
| 4                | 1                | 0              | 1.240342                | -0.381484 | 2.361982  |
| 5                | 6                | 0              | -0.602247               | 0.503192  | 1.814236  |
| 6                | 6                | 0              | -1.494258               | 0.994062  | 2.762199  |
| 7                | 1                | 0              | -1.654555               | 0.457577  | 3.691910  |
| 8                | 6                | 0              | -2.178816               | 2.182372  | 2.490430  |
| 9                | 1                | 0              | -2.888691               | 2.583115  | 3.206442  |
| 10               | 6                | 0              | -1.945045               | 2.842565  | 1.282825  |
| 11               | 1                | 0              | -2.465754               | 3.763241  | 1.039586  |
| 12               | 6                | 0              | -1.032554               | 2.292200  | 0.384837  |
| 13               | 6                | 0              | -0.659509               | 2.961939  | -0.918421 |
| 14               | 1                | 0              | -1.474669               | 3.609975  | -1.261146 |
| 15               | 1                | 0              | 0.230305                | 3.586507  | -0.752936 |
| 16               | 6                | 0              | -0.617947               | -2.474217 | 0.511338  |
| 17               | 1                | 0              | -0.217800               | -3.240406 | -0.161510 |
| 18               | 1                | 0              | -0.957841               | -2.993768 | 1.419097  |
| 19               | 6                | 0              | -1.803384               | -1.835382 | -0.194164 |
| 20               | 6                | 0              | -3.100108               | -2.304213 | 0.002316  |

|    |   |   |           |           |           |
|----|---|---|-----------|-----------|-----------|
| 21 | 1 | 0 | -3.285625 | -3.089577 | 0.728392  |
| 22 | 6 | 0 | -4.145105 | -1.757787 | -0.743678 |
| 23 | 1 | 0 | -5.162190 | -2.110983 | -0.607381 |
| 24 | 6 | 0 | -3.856087 | -0.748344 | -1.661578 |
| 25 | 1 | 0 | -4.634424 | -0.291696 | -2.263105 |
| 26 | 6 | 0 | -2.538697 | -0.319598 | -1.789361 |
| 27 | 1 | 0 | -2.260100 | 0.484975  | -2.460289 |
| 28 | 6 | 0 | 1.828258  | -2.059200 | 0.677227  |
| 29 | 1 | 0 | 1.810044  | -2.839662 | -0.090842 |
| 30 | 1 | 0 | 2.179377  | -2.533202 | 1.605597  |
| 31 | 6 | 0 | 2.825788  | -1.000789 | 0.227419  |
| 32 | 6 | 0 | 4.157666  | -1.048171 | 0.630293  |
| 33 | 1 | 0 | 4.481617  | -1.814839 | 1.327076  |
| 34 | 6 | 0 | 5.061934  | -0.110123 | 0.129158  |
| 35 | 1 | 0 | 6.104071  | -0.133751 | 0.430643  |
| 36 | 6 | 0 | 4.597174  | 0.857798  | -0.760184 |
| 37 | 1 | 0 | 5.259200  | 1.608743  | -1.176958 |
| 38 | 6 | 0 | 3.249083  | 0.852522  | -1.103047 |
| 39 | 1 | 0 | 2.835843  | 1.595531  | -1.777131 |
| 40 | 7 | 0 | 0.464731  | -1.517549 | 0.792719  |
| 41 | 7 | 0 | -0.386857 | 1.143194  | 0.647452  |
| 42 | 7 | 0 | -1.525404 | -0.846601 | -1.075330 |
| 43 | 7 | 0 | 2.369385  | -0.049576 | -0.625338 |
| 44 | 8 | 0 | -0.368880 | 1.951756  | -1.902437 |
| 45 | 1 | 0 | 0.101675  | 2.359333  | -2.639745 |

-----  
**2B** : E(opt)= -1176.0760209 hartree  
 -----

| Center<br>Number | Atomic<br>Number | Atomic<br>Type | Coordinates (Angstroms) |           |           |
|------------------|------------------|----------------|-------------------------|-----------|-----------|
|                  |                  |                | X                       | Y         | Z         |
| 1                | 27               | 0              | -0.000135               | -0.369041 | -0.752519 |
| 2                | 6                | 0              | -0.000016               | -0.484654 | 2.164782  |
| 3                | 1                | 0              | -0.877717               | -0.695042 | 2.783875  |
| 4                | 1                | 0              | 0.877481                | -0.695445 | 2.784030  |
| 5                | 6                | 0              | 0.000307                | 0.975044  | 1.752877  |
| 6                | 6                | 0              | 0.000634                | 2.069668  | 2.610804  |
| 7                | 1                | 0              | 0.000739                | 1.941433  | 3.688075  |
| 8                | 6                | 0              | 0.000817                | 3.348149  | 2.035071  |
| 9                | 1                | 0              | 0.001069                | 4.222935  | 2.677952  |
| 10               | 6                | 0              | 0.000674                | 3.508155  | 0.647771  |
| 11               | 1                | 0              | 0.000808                | 4.496184  | 0.199625  |
| 12               | 6                | 0              | 0.000359                | 2.363869  | -0.153660 |
| 13               | 6                | 0              | 0.000161                | 2.258522  | -1.669566 |

|    |   |   |           |           |           |
|----|---|---|-----------|-----------|-----------|
| 14 | 1 | 0 | -0.878699 | 2.818001  | -2.042709 |
| 15 | 1 | 0 | 0.879079  | 2.817770  | -2.042919 |
| 16 | 6 | 0 | -1.251947 | -2.233983 | 0.906947  |
| 17 | 1 | 0 | -1.053035 | -3.080085 | 0.242363  |
| 18 | 1 | 0 | -1.544785 | -2.629430 | 1.886584  |
| 19 | 6 | 0 | -2.351040 | -1.410562 | 0.275090  |
| 20 | 6 | 0 | -3.705177 | -1.575739 | 0.542154  |
| 21 | 1 | 0 | -4.028129 | -2.271755 | 1.309261  |
| 22 | 6 | 0 | -4.630806 | -0.842695 | -0.205091 |
| 23 | 1 | 0 | -5.693980 | -0.956173 | -0.019345 |
| 24 | 6 | 0 | -4.173210 | 0.026937  | -1.194755 |
| 25 | 1 | 0 | -4.862963 | 0.600086  | -1.803864 |
| 26 | 6 | 0 | -2.801398 | 0.157114  | -1.396361 |
| 27 | 1 | 0 | -2.353525 | 0.799230  | -2.146320 |
| 28 | 6 | 0 | 1.251488  | -2.234220 | 0.906831  |
| 29 | 1 | 0 | 1.052355  | -3.080254 | 0.242226  |
| 30 | 1 | 0 | 1.544327  | -2.629756 | 1.886432  |
| 31 | 6 | 0 | 2.350674  | -1.410986 | 0.274906  |
| 32 | 6 | 0 | 3.704792  | -1.576266 | 0.541986  |
| 33 | 1 | 0 | 4.027682  | -2.272260 | 1.309138  |
| 34 | 6 | 0 | 4.630493  | -0.843349 | -0.205302 |
| 35 | 1 | 0 | 5.693655  | -0.956908 | -0.019539 |
| 36 | 6 | 0 | 4.172979  | 0.026260  | -1.195021 |
| 37 | 1 | 0 | 4.862784  | 0.599312  | -1.804162 |
| 38 | 6 | 0 | 2.801177  | 0.156550  | -1.396638 |
| 39 | 1 | 0 | 2.353369  | 0.798669  | -2.146633 |
| 40 | 7 | 0 | -0.000151 | -1.428034 | 0.976514  |
| 41 | 7 | 0 | 0.000192  | 1.162248  | 0.432163  |
| 42 | 7 | 0 | -1.921249 | -0.541519 | -0.665531 |
| 43 | 7 | 0 | 1.920963  | -0.541962 | -0.665778 |
| 44 | 8 | 0 | -0.000069 | 0.931281  | -2.126384 |
| 45 | 1 | 0 | -0.000359 | -1.534674 | -1.653505 |

-----  
**Int1:** E(opt)= -1364.683841 hartree  
 -----

| Center<br>Number | Atomic<br>Number | Atomic<br>Type | Coordinates (Angstroms) |           |           |
|------------------|------------------|----------------|-------------------------|-----------|-----------|
|                  |                  |                | X                       | Y         | Z         |
| 1                | 27               | 0              | -0.171775               | -0.507158 | -0.533025 |
| 2                | 6                | 0              | 0.080690                | 0.649172  | 2.268324  |
| 3                | 1                | 0              | -0.875889               | 1.000384  | 2.671435  |
| 4                | 1                | 0              | 0.771632                | 0.589060  | 3.118315  |
| 5                | 6                | 0              | 0.564647                | 1.704179  | 1.283081  |
| 6                | 6                | 0              | 1.214574                | 2.869333  | 1.692037  |

|    |   |   |           |           |           |
|----|---|---|-----------|-----------|-----------|
| 7  | 1 | 0 | 1.445841  | 3.031702  | 2.739918  |
| 8  | 6 | 0 | 1.565386  | 3.812634  | 0.725477  |
| 9  | 1 | 0 | 2.078355  | 4.724463  | 1.014315  |
| 10 | 6 | 0 | 1.269125  | 3.569692  | -0.617923 |
| 11 | 1 | 0 | 1.546848  | 4.278756  | -1.390798 |
| 12 | 6 | 0 | 0.620384  | 2.381839  | -0.945181 |
| 13 | 6 | 0 | 0.226874  | 1.993701  | -2.355300 |
| 14 | 1 | 0 | -0.801293 | 2.329857  | -2.549586 |
| 15 | 1 | 0 | 0.887723  | 2.470559  | -3.087632 |
| 16 | 6 | 0 | -1.466373 | -1.251402 | 1.977767  |
| 17 | 1 | 0 | -1.457574 | -2.299083 | 1.662118  |
| 18 | 1 | 0 | -1.698016 | -1.223925 | 3.051481  |
| 19 | 6 | 0 | -2.547586 | -0.546220 | 1.179888  |
| 20 | 6 | 0 | -3.808982 | -0.277734 | 1.706905  |
| 21 | 1 | 0 | -4.027919 | -0.525216 | 2.740605  |
| 22 | 6 | 0 | -4.779191 | 0.301024  | 0.886708  |
| 23 | 1 | 0 | -5.769197 | 0.515943  | 1.276080  |
| 24 | 6 | 0 | -4.457295 | 0.595059  | -0.437565 |
| 25 | 1 | 0 | -5.182653 | 1.035861  | -1.112198 |
| 26 | 6 | 0 | -3.171220 | 0.306254  | -0.886446 |
| 27 | 1 | 0 | -2.869030 | 0.497920  | -1.911141 |
| 28 | 6 | 0 | 0.982914  | -1.631155 | 1.903601  |
| 29 | 1 | 0 | 0.619997  | -2.631641 | 1.648397  |
| 30 | 1 | 0 | 1.296673  | -1.646557 | 2.956672  |
| 31 | 6 | 0 | 2.168337  | -1.341371 | 1.000551  |
| 32 | 6 | 0 | 3.484057  | -1.500829 | 1.429671  |
| 33 | 1 | 0 | 3.690277  | -1.779562 | 2.458089  |
| 34 | 6 | 0 | 4.522207  | -1.304391 | 0.517208  |
| 35 | 1 | 0 | 5.555006  | -1.427773 | 0.827444  |
| 36 | 6 | 0 | 4.212083  | -0.944031 | -0.793381 |
| 37 | 1 | 0 | 4.987702  | -0.781977 | -1.533619 |
| 38 | 6 | 0 | 2.872148  | -0.786713 | -1.140073 |
| 39 | 1 | 0 | 2.564739  | -0.484482 | -2.135580 |
| 40 | 7 | 0 | -0.133548 | -0.691900 | 1.669282  |
| 41 | 7 | 0 | 0.278710  | 1.488358  | -0.006315 |
| 42 | 7 | 0 | -2.234822 | -0.241744 | -0.098038 |
| 43 | 7 | 0 | 1.873607  | -0.984518 | -0.266605 |
| 44 | 8 | 0 | 0.312238  | 0.566366  | -2.453174 |
| 45 | 6 | 0 | -0.858808 | -1.945432 | -1.774921 |
| 46 | 8 | 0 | -0.649111 | -2.724812 | -0.859223 |
| 47 | 8 | 0 | -1.225700 | -1.729288 | -2.903285 |
| 48 | 1 | 0 | -0.276180 | 0.207804  | -3.138025 |

-----  
**Int2:** E(opt)= -1365.2838613 hartree

| Center<br>Number | Atomic<br>Number | Atomic<br>Type | Coordinates (Angstroms) |           |           |
|------------------|------------------|----------------|-------------------------|-----------|-----------|
|                  |                  |                | X                       | Y         | Z         |
| 1                | 27               | 0              | -0.008765               | -0.434143 | 0.478785  |
| 2                | 6                | 0              | 0.103398                | 0.725274  | -2.316694 |
| 3                | 1                | 0              | 1.011905                | 0.827754  | -2.922241 |
| 4                | 1                | 0              | -0.737574               | 0.872109  | -3.006006 |
| 5                | 6                | 0              | 0.080041                | 1.853855  | -1.291264 |
| 6                | 6                | 0              | 0.142508                | 3.193715  | -1.676919 |
| 7                | 1                | 0              | 0.217468                | 3.456446  | -2.727388 |
| 8                | 6                | 0              | 0.113652                | 4.178628  | -0.691686 |
| 9                | 1                | 0              | 0.171704                | 5.227526  | -0.964320 |
| 10               | 6                | 0              | 0.010425                | 3.806152  | 0.650087  |
| 11               | 1                | 0              | -0.014828               | 4.552239  | 1.437627  |
| 12               | 6                | 0              | -0.062582               | 2.451510  | 0.961632  |
| 13               | 6                | 0              | -0.267091               | 1.962717  | 2.384343  |
| 14               | 1                | 0              | 0.286732                | 2.600251  | 3.083899  |
| 15               | 1                | 0              | -1.335415               | 2.043920  | 2.630112  |
| 16               | 6                | 0              | 1.275879                | -1.416560 | -1.905422 |
| 17               | 1                | 0              | 1.044295                | -2.442291 | -1.603054 |
| 18               | 1                | 0              | 1.630039                | -1.425071 | -2.945910 |
| 19               | 6                | 0              | 2.371727                | -0.925995 | -0.978337 |
| 20               | 6                | 0              | 3.718497                | -0.958785 | -1.331668 |
| 21               | 1                | 0              | 4.005844                | -1.285266 | -2.325884 |
| 22               | 6                | 0              | 4.679683                | -0.579503 | -0.394187 |
| 23               | 1                | 0              | 5.734378                | -0.603438 | -0.649150 |
| 24               | 6                | 0              | 4.262771                | -0.168654 | 0.871208  |
| 25               | 1                | 0              | 4.974679                | 0.133279  | 1.631226  |
| 26               | 6                | 0              | 2.899395                | -0.147185 | 1.149831  |
| 27               | 1                | 0              | 2.506917                | 0.168973  | 2.109122  |
| 28               | 6                | 0              | -1.212446               | -1.351290 | -1.973221 |
| 29               | 1                | 0              | -1.035056               | -2.396688 | -1.701956 |
| 30               | 1                | 0              | -1.529613               | -1.315000 | -3.025066 |
| 31               | 6                | 0              | -2.330216               | -0.857482 | -1.071377 |
| 32               | 6                | 0              | -3.662390               | -0.845256 | -1.479400 |
| 33               | 1                | 0              | -3.913833               | -1.120030 | -2.498626 |
| 34               | 6                | 0              | -4.656266               | -0.491983 | -0.566524 |
| 35               | 1                | 0              | -5.699115               | -0.480810 | -0.866652 |
| 36               | 6                | 0              | -4.287645               | -0.159099 | 0.736536  |
| 37               | 1                | 0              | -5.025621               | 0.112118  | 1.483066  |
| 38               | 6                | 0              | -2.937017               | -0.180015 | 1.067903  |
| 39               | 1                | 0              | -2.592125               | 0.061330  | 2.067036  |
| 40               | 7                | 0              | 0.044226                | -0.627469 | -1.732373 |



|    |   |   |           |           |          |
|----|---|---|-----------|-----------|----------|
| 41 | 7 | 0 | -0.013771 | 1.510398  | 0.001626 |
| 42 | 7 | 0 | 1.976213  | -0.515201 | 0.247079 |
| 43 | 7 | 0 | -1.979022 | -0.509829 | 0.187675 |
| 44 | 8 | 0 | 0.173509  | 0.606994  | 2.474728 |
| 45 | 6 | 0 | -0.050071 | -2.249427 | 1.038023 |
| 46 | 8 | 0 | 0.035696  | -3.272453 | 0.373552 |
| 47 | 8 | 0 | -0.245757 | -2.351428 | 2.404580 |
| 48 | 1 | 0 | -0.271775 | -3.304003 | 2.619200 |
| 49 | 1 | 0 | -0.246969 | 0.124606  | 3.199666 |

-----  
**Int3:** E(opt)= -1467.931799 hartree  
 -----

| Center<br>Number | Atomic<br>Number | Atomic<br>Type | Coordinates (Angstroms) |           |           |
|------------------|------------------|----------------|-------------------------|-----------|-----------|
|                  |                  |                | X                       | Y         | Z         |
| 1                | 27               | 0              | -0.323260               | -0.232520 | -0.711548 |
| 2                | 6                | 0              | -2.459557               | 1.768479  | 0.397945  |
| 3                | 1                | 0              | -2.645865               | 2.849703  | 0.366587  |
| 4                | 1                | 0              | -3.411981               | 1.301440  | 0.673072  |
| 5                | 6                | 0              | -1.469792               | 1.456041  | 1.514516  |
| 6                | 6                | 0              | -1.464048               | 2.165372  | 2.715027  |
| 7                | 1                | 0              | -2.142289               | 2.999400  | 2.864757  |
| 8                | 6                | 0              | -0.563427               | 1.785383  | 3.712119  |
| 9                | 1                | 0              | -0.531014               | 2.326969  | 4.652356  |
| 10               | 6                | 0              | 0.301343                | 0.713736  | 3.490137  |
| 11               | 1                | 0              | 1.016740                | 0.404042  | 4.245191  |
| 12               | 6                | 0              | 0.232598                | 0.052131  | 2.263424  |
| 13               | 6                | 0              | 1.094085                | -1.147771 | 1.930847  |
| 14               | 1                | 0              | 2.091340                | -1.014389 | 2.370543  |
| 15               | 1                | 0              | 0.647777                | -2.036225 | 2.408601  |
| 16               | 6                | 0              | -1.466229               | 2.295328  | -1.800473 |
| 17               | 1                | 0              | -1.315740               | 1.837961  | -2.784375 |
| 18               | 1                | 0              | -2.128068               | 3.165702  | -1.923459 |
| 19               | 6                | 0              | -0.109814               | 2.731139  | -1.286680 |
| 20               | 6                | 0              | 0.333170                | 4.051488  | -1.356345 |
| 21               | 1                | 0              | -0.317104               | 4.822193  | -1.757612 |
| 22               | 6                | 0              | 1.617557                | 4.358256  | -0.904863 |
| 23               | 1                | 0              | 1.986048                | 5.378178  | -0.952547 |
| 24               | 6                | 0              | 2.414226                | 3.338614  | -0.383902 |
| 25               | 1                | 0              | 3.414816                | 3.534621  | -0.014519 |
| 26               | 6                | 0              | 1.891393                | 2.048703  | -0.338916 |
| 27               | 1                | 0              | 2.455436                | 1.214798  | 0.062795  |
| 28               | 6                | 0              | -3.100643               | 0.466209  | -1.601084 |
| 29               | 1                | 0              | -2.716969               | 0.213785  | -2.595283 |

|    |   |   |           |           |           |
|----|---|---|-----------|-----------|-----------|
| 30 | 1 | 0 | -4.042179 | 1.021831  | -1.724005 |
| 31 | 6 | 0 | -3.348069 | -0.831991 | -0.858171 |
| 32 | 6 | 0 | -4.615172 | -1.412139 | -0.784043 |
| 33 | 1 | 0 | -5.467232 | -0.916037 | -1.238019 |
| 34 | 6 | 0 | -4.763504 | -2.630816 | -0.121802 |
| 35 | 1 | 0 | -5.737871 | -3.104571 | -0.055637 |
| 36 | 6 | 0 | -3.644056 | -3.222327 | 0.463917  |
| 37 | 1 | 0 | -3.715746 | -4.163270 | 0.998338  |
| 38 | 6 | 0 | -2.419506 | -2.567506 | 0.354866  |
| 39 | 1 | 0 | -1.519330 | -2.975380 | 0.805319  |
| 40 | 7 | 0 | -2.057325 | 1.263193  | -0.934007 |
| 41 | 7 | 0 | -0.632243 | 0.429106  | 1.316809  |
| 42 | 7 | 0 | 0.665032  | 1.751296  | -0.786808 |
| 43 | 7 | 0 | -2.269064 | -1.408199 | -0.298218 |
| 44 | 8 | 0 | 1.175883  | -1.334247 | 0.524541  |
| 45 | 1 | 0 | -0.273439 | -0.664310 | -2.269102 |
| 46 | 7 | 0 | 3.320579  | -2.246267 | -0.294889 |
| 47 | 6 | 0 | 2.028966  | -2.572407 | 0.113056  |
| 48 | 6 | 0 | 3.647969  | -1.967898 | -1.696812 |
| 49 | 6 | 0 | 4.347193  | -1.984305 | 0.709346  |
| 50 | 6 | 0 | 1.174459  | -3.301309 | -0.909300 |
| 51 | 1 | 0 | 0.242552  | -3.622979 | -0.441678 |
| 52 | 1 | 0 | 1.702597  | -4.186528 | -1.273447 |
| 53 | 1 | 0 | 0.912508  | -2.652545 | -1.747347 |
| 54 | 6 | 0 | 3.183989  | -0.614860 | -2.248831 |
| 55 | 1 | 0 | 3.465728  | -0.529822 | -3.304014 |
| 56 | 1 | 0 | 3.645533  | 0.217641  | -1.711872 |
| 57 | 1 | 0 | 2.096834  | -0.509113 | -2.186982 |
| 58 | 6 | 0 | 4.637310  | -0.506830 | 1.009683  |
| 59 | 1 | 0 | 3.745480  | 0.008776  | 1.379950  |
| 60 | 1 | 0 | 4.985633  | 0.016880  | 0.115088  |
| 61 | 1 | 0 | 5.419745  | -0.420883 | 1.770980  |
| 62 | 1 | 0 | 4.048335  | -2.492682 | 1.634093  |
| 63 | 1 | 0 | 5.279123  | -2.464890 | 0.383757  |
| 64 | 1 | 0 | 2.080564  | -3.141053 | 1.048164  |
| 65 | 1 | 0 | 4.737001  | -2.047387 | -1.782813 |
| 66 | 1 | 0 | 3.240505  | -2.768063 | -2.323586 |

-----  
**3<sub>dp</sub>** : E(opt)= -1176.2144031 hartree  
 -----

| Center<br>Number | Atomic<br>Number | Atomic<br>Type | Coordinates (Angstroms) |           |           |
|------------------|------------------|----------------|-------------------------|-----------|-----------|
|                  |                  |                | X                       | Y         | Z         |
| 1                | 27               | 0              | -0.000887               | -0.201393 | -1.311304 |

|    |   |   |           |           |           |
|----|---|---|-----------|-----------|-----------|
| 2  | 6 | 0 | -0.000858 | -0.814032 | 1.906689  |
| 3  | 1 | 0 | -0.878080 | -1.072497 | 2.513948  |
| 4  | 1 | 0 | 0.874643  | -1.075143 | 2.515323  |
| 5  | 6 | 0 | 0.001428  | 0.695340  | 1.678171  |
| 6  | 6 | 0 | 0.003626  | 1.601562  | 2.736338  |
| 7  | 1 | 0 | 0.004071  | 1.252823  | 3.765207  |
| 8  | 6 | 0 | 0.005235  | 2.968657  | 2.436556  |
| 9  | 1 | 0 | 0.006960  | 3.700225  | 3.240171  |
| 10 | 6 | 0 | 0.004668  | 3.383870  | 1.107546  |
| 11 | 1 | 0 | 0.005936  | 4.438665  | 0.847460  |
| 12 | 6 | 0 | 0.002535  | 2.414244  | 0.097883  |
| 13 | 6 | 0 | 0.001935  | 2.704759  | -1.406790 |
| 14 | 1 | 0 | -0.876232 | 3.369870  | -1.580073 |
| 15 | 1 | 0 | 0.881113  | 3.368270  | -1.581067 |
| 16 | 6 | 0 | -1.230985 | -2.385780 | 0.454067  |
| 17 | 1 | 0 | -1.060314 | -3.002076 | -0.435787 |
| 18 | 1 | 0 | -1.464518 | -3.049957 | 1.302532  |
| 19 | 6 | 0 | -2.412929 | -1.490644 | 0.141212  |
| 20 | 6 | 0 | -3.680419 | -1.677386 | 0.693448  |
| 21 | 1 | 0 | -3.846747 | -2.462792 | 1.424707  |
| 22 | 6 | 0 | -4.720588 | -0.838827 | 0.286953  |
| 23 | 1 | 0 | -5.716917 | -0.961696 | 0.701525  |
| 24 | 6 | 0 | -4.461257 | 0.158861  | -0.652805 |
| 25 | 1 | 0 | -5.241869 | 0.832088  | -0.991315 |
| 26 | 6 | 0 | -3.162712 | 0.282262  | -1.148361 |
| 27 | 1 | 0 | -2.877855 | 1.040495  | -1.873482 |
| 28 | 6 | 0 | 1.227646  | -2.386950 | 0.453944  |
| 29 | 1 | 0 | 1.056167  | -3.003401 | -0.435642 |
| 30 | 1 | 0 | 1.460783  | -3.051067 | 1.302567  |
| 31 | 6 | 0 | 2.410365  | -1.493046 | 0.140470  |
| 32 | 6 | 0 | 3.677761  | -1.680607 | 0.692641  |
| 33 | 1 | 0 | 3.843503  | -2.465767 | 1.424297  |
| 34 | 6 | 0 | 4.718604  | -0.843163 | 0.285567  |
| 35 | 1 | 0 | 5.714880  | -0.966679 | 0.700075  |
| 36 | 6 | 0 | 4.460020  | 0.154261  | -0.654677 |
| 37 | 1 | 0 | 5.241173  | 0.826637  | -0.993630 |
| 38 | 6 | 0 | 3.161515  | 0.278538  | -1.150125 |
| 39 | 1 | 0 | 2.877171  | 1.036682  | -1.875541 |
| 40 | 7 | 0 | -0.001284 | -1.609334 | 0.665463  |
| 41 | 7 | 0 | 0.000948  | 1.112934  | 0.409622  |
| 42 | 7 | 0 | -2.171388 | -0.524197 | -0.758717 |
| 43 | 7 | 0 | 2.169559  | -0.526875 | -0.759940 |
| 44 | 8 | 0 | 0.000482  | 1.592658  | -2.200891 |
| 45 | 1 | 0 | -0.002152 | -1.417516 | -2.446297 |

-----  
**3** : E(opt)= -1176.6669379 hartree  
-----

| Center<br>Number | Atomic<br>Number | Atomic<br>Type | Coordinates (Angstroms) |           |           |
|------------------|------------------|----------------|-------------------------|-----------|-----------|
|                  |                  |                | X                       | Y         | Z         |
| 1                | 27               | 0              | -0.000508               | -0.294802 | -1.201978 |
| 2                | 6                | 0              | -0.000472               | -0.763305 | 1.873297  |
| 3                | 1                | 0              | -0.876628               | -1.016803 | 2.481576  |
| 4                | 1                | 0              | 0.874674                | -1.018319 | 2.482403  |
| 5                | 6                | 0              | 0.000818                | 0.742366  | 1.650261  |
| 6                | 6                | 0              | 0.002047                | 1.621458  | 2.733442  |
| 7                | 1                | 0              | 0.002287                | 1.239557  | 3.749515  |
| 8                | 6                | 0              | 0.002942                | 2.993320  | 2.483628  |
| 9                | 1                | 0              | 0.003905                | 3.699784  | 3.307637  |
| 10               | 6                | 0              | 0.002611                | 3.450181  | 1.166557  |
| 11               | 1                | 0              | 0.003305                | 4.511979  | 0.941206  |
| 12               | 6                | 0              | 0.001402                | 2.508886  | 0.138106  |
| 13               | 6                | 0              | 0.001025                | 2.937345  | -1.317582 |
| 14               | 1                | 0              | -0.886262               | 3.555038  | -1.513799 |
| 15               | 1                | 0              | 0.888668                | 3.554310  | -1.514465 |
| 16               | 6                | 0              | -1.231450               | -2.386794 | 0.483996  |
| 17               | 1                | 0              | -1.068120               | -3.061991 | -0.362492 |
| 18               | 1                | 0              | -1.433555               | -3.000217 | 1.373395  |
| 19               | 6                | 0              | -2.425335               | -1.517896 | 0.146177  |
| 20               | 6                | 0              | -3.699793               | -1.761071 | 0.656131  |
| 21               | 1                | 0              | -3.857478               | -2.562169 | 1.371218  |
| 22               | 6                | 0              | -4.761449               | -0.963867 | 0.224449  |
| 23               | 1                | 0              | -5.764134               | -1.134274 | 0.603591  |
| 24               | 6                | 0              | -4.514829               | 0.051621  | -0.699138 |
| 25               | 1                | 0              | -5.312122               | 0.690518  | -1.062594 |
| 26               | 6                | 0              | -3.208890               | 0.233006  | -1.150601 |
| 27               | 1                | 0              | -2.955531               | 1.007400  | -1.869067 |
| 28               | 6                | 0              | 1.229634                | -2.387418 | 0.483905  |
| 29               | 1                | 0              | 1.065831                | -3.062649 | -0.362465 |
| 30               | 1                | 0              | 1.431561                | -3.000824 | 1.373356  |
| 31               | 6                | 0              | 2.423921                | -1.519203 | 0.145764  |
| 32               | 6                | 0              | 3.698315                | -1.762909 | 0.655625  |
| 33               | 1                | 0              | 3.855674                | -2.563908 | 1.370894  |
| 34               | 6                | 0              | 4.760332                | -0.966363 | 0.223610  |
| 35               | 1                | 0              | 5.762975                | -1.137193 | 0.602672  |
| 36               | 6                | 0              | 4.514124                | 0.049013  | -0.700209 |
| 37               | 1                | 0              | 5.311702                | 0.687400  | -1.063933 |
| 38               | 6                | 0              | 3.208221                | 0.230960  | -1.151553 |

|    |   |   |           |           |           |
|----|---|---|-----------|-----------|-----------|
| 39 | 1 | 0 | 2.955170  | 1.005308  | -1.870179 |
| 40 | 7 | 0 | -0.000693 | -1.579023 | 0.634105  |
| 41 | 7 | 0 | 0.000529  | 1.191516  | 0.387597  |
| 42 | 7 | 0 | -2.189820 | -0.529857 | -0.736805 |
| 43 | 7 | 0 | 2.188809  | -0.531269 | -0.737438 |
| 44 | 8 | 0 | 0.000233  | 1.769176  | -2.132631 |
| 45 | 1 | 0 | -0.001015 | -1.160891 | -2.556692 |
| 46 | 1 | 0 | 0.000120  | 1.978634  | -3.074710 |

-----  
**TS-2A** : E(opt)= -1467.8910492 hartree  
 -----

| Center<br>Number | Atomic<br>Number | Atomic<br>Type | Coordinates (Angstroms) |           |           |
|------------------|------------------|----------------|-------------------------|-----------|-----------|
|                  |                  |                | X                       | Y         | Z         |
| 1                | 27               | 0              | -0.623683               | 0.272321  | -0.675532 |
| 2                | 6                | 0              | -1.085735               | 0.255089  | 2.298727  |
| 3                | 1                | 0              | -0.861279               | -0.258634 | 3.243969  |
| 4                | 1                | 0              | -1.375554               | 1.279630  | 2.558792  |
| 5                | 6                | 0              | -2.288840               | -0.385070 | 1.623901  |
| 6                | 6                | 0              | -3.267567               | -1.081168 | 2.330147  |
| 7                | 1                | 0              | -3.158664               | -1.245532 | 3.397422  |
| 8                | 6                | 0              | -4.380116               | -1.563911 | 1.638654  |
| 9                | 1                | 0              | -5.151930               | -2.120500 | 2.160391  |
| 10               | 6                | 0              | -4.485021               | -1.328990 | 0.267260  |
| 11               | 1                | 0              | -5.335791               | -1.694085 | -0.299080 |
| 12               | 6                | 0              | -3.467333               | -0.619713 | -0.369002 |
| 13               | 6                | 0              | -3.534877               | -0.252358 | -1.835700 |
| 14               | 1                | 0              | -4.161603               | -0.971366 | -2.377116 |
| 15               | 1                | 0              | -4.001075               | 0.739888  | -1.925298 |
| 16               | 6                | 0              | 0.980810                | -0.842877 | 1.496863  |
| 17               | 1                | 0              | 1.959735                | -0.537607 | 1.106493  |
| 18               | 1                | 0              | 1.131021                | -1.192511 | 2.529553  |
| 19               | 6                | 0              | 0.502242                | -1.989773 | 0.626403  |
| 20               | 6                | 0              | 0.777571                | -3.316327 | 0.953364  |
| 21               | 1                | 0              | 1.259244                | -3.546767 | 1.898338  |
| 22               | 6                | 0              | 0.440333                | -4.329476 | 0.055847  |
| 23               | 1                | 0              | 0.651553                | -5.367623 | 0.291231  |
| 24               | 6                | 0              | -0.176678               | -3.979409 | -1.145929 |
| 25               | 1                | 0              | -0.457601               | -4.730217 | -1.876479 |
| 26               | 6                | 0              | -0.442962               | -2.637072 | -1.394923 |
| 27               | 1                | 0              | -0.945333               | -2.306332 | -2.296598 |
| 28               | 6                | 0              | 0.781231                | 1.632515  | 1.450166  |
| 29               | 1                | 0              | 1.747256                | 1.497113  | 0.957149  |
| 30               | 1                | 0              | 0.978577                | 1.997473  | 2.469663  |

|    |   |   |           |           |           |
|----|---|---|-----------|-----------|-----------|
| 31 | 6 | 0 | 0.009937  | 2.681958  | 0.665762  |
| 32 | 6 | 0 | 0.032186  | 4.027034  | 1.025495  |
| 33 | 1 | 0 | 0.563242  | 4.333575  | 1.921337  |
| 34 | 6 | 0 | -0.625929 | 4.964798  | 0.227915  |
| 35 | 1 | 0 | -0.615793 | 6.017417  | 0.491283  |
| 36 | 6 | 0 | -1.300615 | 4.518726  | -0.908158 |
| 37 | 1 | 0 | -1.829082 | 5.206422  | -1.559289 |
| 38 | 6 | 0 | -1.292222 | 3.157504  | -1.195181 |
| 39 | 1 | 0 | -1.809338 | 2.757487  | -2.061383 |
| 40 | 7 | 0 | 0.100691  | 0.329824  | 1.428498  |
| 41 | 7 | 0 | -2.391812 | -0.173030 | 0.299493  |
| 42 | 7 | 0 | -0.112923 | -1.655403 | -0.533342 |
| 43 | 7 | 0 | -0.655162 | 2.249288  | -0.433833 |
| 44 | 8 | 0 | -2.206942 | -0.224660 | -2.376802 |
| 45 | 1 | 0 | -2.205478 | 0.277744  | -3.200440 |
| 46 | 7 | 0 | 3.774813  | -0.009302 | -0.440041 |
| 47 | 6 | 0 | 3.153893  | 0.948569  | -1.234734 |
| 48 | 6 | 0 | 5.014030  | 0.441075  | 0.222286  |
| 49 | 6 | 0 | 3.696300  | -1.405705 | -0.897318 |
| 50 | 6 | 0 | 2.132266  | 0.726458  | -2.145295 |
| 51 | 1 | 0 | 1.830877  | 1.584881  | -2.737583 |
| 52 | 1 | 0 | 0.788824  | 0.526228  | -1.432938 |
| 53 | 1 | 0 | 2.052222  | -0.223224 | -2.664091 |
| 54 | 6 | 0 | 4.737008  | 1.361712  | 1.413355  |
| 55 | 1 | 0 | 5.676895  | 1.668136  | 1.882321  |
| 56 | 1 | 0 | 4.129486  | 0.844858  | 2.163309  |
| 57 | 1 | 0 | 4.207671  | 2.271877  | 1.113733  |
| 58 | 6 | 0 | 4.124181  | -2.439574 | 0.144961  |
| 59 | 1 | 0 | 3.640568  | -2.255806 | 1.109453  |
| 60 | 1 | 0 | 5.204936  | -2.463306 | 0.305092  |
| 61 | 1 | 0 | 3.825050  | -3.434419 | -0.196856 |
| 62 | 1 | 0 | 2.649832  | -1.594295 | -1.149902 |
| 63 | 1 | 0 | 4.275982  | -1.544130 | -1.824580 |
| 64 | 1 | 0 | 3.391656  | 1.970772  | -0.955745 |
| 65 | 1 | 0 | 5.551728  | -0.437118 | 0.578770  |
| 66 | 1 | 0 | 5.673339  | 0.940842  | -0.501765 |

-----  
**TS-CO** : E(opt)= -1365.2645845 hartree  
 -----

| Center<br>Number | Atomic<br>Number | Atomic<br>Type | Coordinates (Angstroms) |           |           |
|------------------|------------------|----------------|-------------------------|-----------|-----------|
|                  |                  |                | X                       | Y         | Z         |
| 1                | 27               | 0              | 0.289067                | -0.603106 | 0.198091  |
| 2                | 6                | 0              | 0.219964                | 2.174189  | -1.153489 |

|    |   |   |           |           |           |
|----|---|---|-----------|-----------|-----------|
| 3  | 1 | 0 | 1.215911  | 2.543808  | -0.885300 |
| 4  | 1 | 0 | -0.168093 | 2.839677  | -1.935828 |
| 5  | 6 | 0 | -0.632246 | 2.253065  | 0.097070  |
| 6  | 6 | 0 | -1.405805 | 3.351980  | 0.450901  |
| 7  | 1 | 0 | -1.494351 | 4.204802  | -0.213880 |
| 8  | 6 | 0 | -2.057734 | 3.330359  | 1.690225  |
| 9  | 1 | 0 | -2.665432 | 4.175857  | 1.997260  |
| 10 | 6 | 0 | -1.924942 | 2.225253  | 2.528026  |
| 11 | 1 | 0 | -2.418772 | 2.190946  | 3.493779  |
| 12 | 6 | 0 | -1.146483 | 1.148533  | 2.094412  |
| 13 | 6 | 0 | -0.966763 | -0.140672 | 2.880687  |
| 14 | 1 | 0 | -0.729346 | 0.104049  | 3.924843  |
| 15 | 1 | 0 | -1.927657 | -0.679125 | 2.886327  |
| 16 | 6 | 0 | 1.726609  | 0.564278  | -2.227291 |
| 17 | 1 | 0 | 1.706579  | -0.396211 | -2.752877 |
| 18 | 1 | 0 | 2.005095  | 1.335506  | -2.959127 |
| 19 | 6 | 0 | 2.767996  | 0.468803  | -1.129653 |
| 20 | 6 | 0 | 4.080135  | 0.905811  | -1.295449 |
| 21 | 1 | 0 | 4.381890  | 1.383833  | -2.221787 |
| 22 | 6 | 0 | 4.991640  | 0.712083  | -0.255646 |
| 23 | 1 | 0 | 6.020626  | 1.040313  | -0.362848 |
| 24 | 6 | 0 | 4.562471  | 0.097701  | 0.920772  |
| 25 | 1 | 0 | 5.239086  | -0.067811 | 1.751529  |
| 26 | 6 | 0 | 3.231891  | -0.301684 | 1.014313  |
| 27 | 1 | 0 | 2.827814  | -0.775035 | 1.903972  |
| 28 | 6 | 0 | -0.714614 | 0.385535  | -2.569123 |
| 29 | 1 | 0 | -0.334030 | -0.412628 | -3.215279 |
| 30 | 1 | 0 | -1.018511 | 1.211086  | -3.226591 |
| 31 | 6 | 0 | -1.914013 | -0.182833 | -1.836195 |
| 32 | 6 | 0 | -3.217555 | -0.012971 | -2.295334 |
| 33 | 1 | 0 | -3.415791 | 0.622114  | -3.152817 |
| 34 | 6 | 0 | -4.254555 | -0.682979 | -1.641690 |
| 35 | 1 | 0 | -5.279290 | -0.565994 | -1.980207 |
| 36 | 6 | 0 | -3.954035 | -1.511132 | -0.561267 |
| 37 | 1 | 0 | -4.728206 | -2.064167 | -0.041064 |
| 38 | 6 | 0 | -2.625454 | -1.623046 | -0.154888 |
| 39 | 1 | 0 | -2.309249 | -2.268251 | 0.661167  |
| 40 | 7 | 0 | 0.378915  | 0.785674  | -1.657820 |
| 41 | 7 | 0 | -0.525030 | 1.191717  | 0.910041  |
| 42 | 7 | 0 | 2.360031  | -0.119786 | 0.010654  |
| 43 | 7 | 0 | -1.634739 | -0.958340 | -0.772124 |
| 44 | 8 | 0 | 0.050893  | -0.934291 | 2.306905  |
| 45 | 6 | 0 | 0.667883  | -2.679499 | 0.115210  |
| 46 | 8 | 0 | 1.217036  | -3.604088 | -0.343400 |

|    |   |   |           |           |          |
|----|---|---|-----------|-----------|----------|
| 47 | 8 | 0 | -0.400572 | -3.130229 | 1.477792 |
| 48 | 1 | 0 | -0.117657 | -3.994607 | 1.813345 |
| 49 | 1 | 0 | -0.194869 | -1.986950 | 2.171750 |

-----  
**TS-H<sub>2</sub>** : E(opt)= -1467.91559838 hartree  
 -----

| Center<br>Number | Atomic<br>Number | Atomic<br>Type | Coordinates (Angstroms) |           |           |
|------------------|------------------|----------------|-------------------------|-----------|-----------|
|                  |                  |                | X                       | Y         | Z         |
| 1                | 27               | 0              | -0.171268               | -0.039911 | -0.262181 |
| 2                | 6                | 0              | -2.296671               | 2.024333  | -0.253391 |
| 3                | 1                | 0              | -1.891910               | 3.029038  | -0.092609 |
| 4                | 1                | 0              | -3.324931               | 2.154345  | -0.611294 |
| 5                | 6                | 0              | -2.280988               | 1.298146  | 1.076764  |
| 6                | 6                | 0              | -3.180998               | 1.522974  | 2.111806  |
| 7                | 1                | 0              | -3.999035               | 2.225623  | 1.991788  |
| 8                | 6                | 0              | -3.002735               | 0.818712  | 3.309192  |
| 9                | 1                | 0              | -3.689877               | 0.976295  | 4.134802  |
| 10               | 6                | 0              | -1.952975               | -0.089719 | 3.437727  |
| 11               | 1                | 0              | -1.808495               | -0.652325 | 4.354388  |
| 12               | 6                | 0              | -1.092194               | -0.281651 | 2.354587  |
| 13               | 6                | 0              | 0.068286                | -1.257391 | 2.261141  |
| 14               | 1                | 0              | 0.781663                | -0.999154 | 3.071500  |
| 15               | 1                | 0              | -0.329355               | -2.255143 | 2.538783  |
| 16               | 6                | 0              | -0.561130               | 2.303552  | -1.978892 |
| 17               | 1                | 0              | -0.102397               | 1.768751  | -2.816711 |
| 18               | 1                | 0              | -1.107464               | 3.165911  | -2.386763 |
| 19               | 6                | 0              | 0.545797                | 2.759803  | -1.046729 |
| 20               | 6                | 0              | 1.107139                | 4.034538  | -1.112096 |
| 21               | 1                | 0              | 0.728480                | 4.763424  | -1.821935 |
| 22               | 6                | 0              | 2.159828                | 4.348785  | -0.250693 |
| 23               | 1                | 0              | 2.617494                | 5.332591  | -0.281232 |
| 24               | 6                | 0              | 2.606127                | 3.385351  | 0.654394  |
| 25               | 1                | 0              | 3.415717                | 3.593047  | 1.345686  |
| 26               | 6                | 0              | 1.980174                | 2.139932  | 0.660717  |
| 27               | 1                | 0              | 2.275633                | 1.347750  | 1.341055  |
| 28               | 6                | 0              | -2.272556               | 0.548214  | -2.242850 |
| 29               | 1                | 0              | -1.617695               | 0.284199  | -3.079275 |
| 30               | 1                | 0              | -3.113677               | 1.130235  | -2.644421 |
| 31               | 6                | 0              | -2.758027               | -0.743272 | -1.613200 |
| 32               | 6                | 0              | -4.042459               | -1.249575 | -1.801659 |
| 33               | 1                | 0              | -4.771256               | -0.696116 | -2.385641 |
| 34               | 6                | 0              | -4.366427               | -2.481032 | -1.226019 |
| 35               | 1                | 0              | -5.358689               | -2.901488 | -1.356433 |



|    |   |   |           |           |           |
|----|---|---|-----------|-----------|-----------|
| 36 | 6 | 0 | -3.402434 | -3.157271 | -0.478463 |
| 37 | 1 | 0 | -3.618292 | -4.113552 | -0.014271 |
| 38 | 6 | 0 | -2.145759 | -2.569526 | -0.329792 |
| 39 | 1 | 0 | -1.351018 | -3.024289 | 0.255351  |
| 40 | 7 | 0 | -1.458141 | 1.344855  | -1.294077 |
| 41 | 7 | 0 | -1.275755 | 0.422220  | 1.225678  |
| 42 | 7 | 0 | 0.978963  | 1.834720  | -0.173442 |
| 43 | 7 | 0 | -1.834588 | -1.396275 | -0.888962 |
| 44 | 8 | 0 | 0.669849  | -1.256154 | 1.006989  |
| 45 | 1 | 0 | 0.695494  | -0.435262 | -1.589569 |
| 46 | 7 | 0 | 3.669862  | -2.276937 | -0.186800 |
| 47 | 6 | 0 | 2.478412  | -2.742662 | -0.554354 |
| 48 | 6 | 0 | 4.524046  | -1.529935 | -1.121239 |
| 49 | 6 | 0 | 4.088886  | -2.372932 | 1.221445  |
| 50 | 6 | 0 | 1.838808  | -2.557713 | -1.786121 |
| 51 | 1 | 0 | 1.016662  | -3.238794 | -1.989925 |
| 52 | 1 | 0 | 2.422642  | -2.275214 | -2.659370 |
| 53 | 1 | 0 | 1.122490  | -1.337232 | -1.541034 |
| 54 | 6 | 0 | 4.085279  | -0.076906 | -1.346226 |
| 55 | 1 | 0 | 4.733513  | 0.388253  | -2.095639 |
| 56 | 1 | 0 | 4.154959  | 0.506988  | -0.426355 |
| 57 | 1 | 0 | 3.052186  | -0.020889 | -1.695052 |
| 58 | 6 | 0 | 3.835603  | -1.084971 | 2.008918  |
| 59 | 1 | 0 | 2.787723  | -0.801048 | 1.876935  |
| 60 | 1 | 0 | 4.481647  | -0.271366 | 1.666531  |
| 61 | 1 | 0 | 4.043320  | -1.250505 | 3.070669  |
| 62 | 1 | 0 | 3.530888  | -3.197792 | 1.672175  |
| 63 | 1 | 0 | 5.147858  | -2.651506 | 1.241817  |
| 64 | 1 | 0 | 1.920318  | -3.223163 | 0.240414  |
| 65 | 1 | 0 | 5.542635  | -1.561702 | -0.725088 |
| 66 | 1 | 0 | 4.537641  | -2.071847 | -2.072856 |

-----  
**TS-HCOOH** : E(opt)= -1365.25932599 hartree  
 -----

| Center<br>Number | Atomic<br>Number | Atomic<br>Type | Coordinates (Angstroms) |           |           |
|------------------|------------------|----------------|-------------------------|-----------|-----------|
|                  |                  |                | X                       | Y         | Z         |
| 1                | 27               | 0              | -0.252487               | 0.679316  | 0.067294  |
| 2                | 6                | 0              | -0.530992               | -2.124852 | -1.178444 |
| 3                | 1                | 0              | -1.579417               | -2.401819 | -1.022812 |
| 4                | 1                | 0              | -0.126531               | -2.824515 | -1.921174 |
| 5                | 6                | 0              | 0.171389                | -2.298133 | 0.155184  |
| 6                | 6                | 0              | 0.689634                | -3.513589 | 0.593406  |
| 7                | 1                | 0              | 0.678645                | -4.384418 | -0.053801 |

|    |   |   |           |           |           |
|----|---|---|-----------|-----------|-----------|
| 8  | 6 | 0 | 1.211116  | -3.585016 | 1.888659  |
| 9  | 1 | 0 | 1.614806  | -4.521135 | 2.261362  |
| 10 | 6 | 0 | 1.207209  | -2.452057 | 2.701160  |
| 11 | 1 | 0 | 1.598911  | -2.485517 | 3.712678  |
| 12 | 6 | 0 | 0.694487  | -1.263484 | 2.179168  |
| 13 | 6 | 0 | 0.702522  | 0.047972  | 2.943192  |
| 14 | 1 | 0 | 0.375559  | -0.119002 | 3.976522  |
| 15 | 1 | 0 | 1.730344  | 0.434930  | 2.978200  |
| 16 | 6 | 0 | -1.800867 | -0.334858 | -2.282735 |
| 17 | 1 | 0 | -1.647764 | 0.625632  | -2.785965 |
| 18 | 1 | 0 | -2.151866 | -1.054259 | -3.035447 |
| 19 | 6 | 0 | -2.844624 | -0.132147 | -1.201542 |
| 20 | 6 | 0 | -4.195819 | -0.408416 | -1.398177 |
| 21 | 1 | 0 | -4.534586 | -0.834418 | -2.337157 |
| 22 | 6 | 0 | -5.097076 | -0.121678 | -0.371026 |
| 23 | 1 | 0 | -6.155736 | -0.323219 | -0.500029 |
| 24 | 6 | 0 | -4.618156 | 0.421718  | 0.820933  |
| 25 | 1 | 0 | -5.285440 | 0.656621  | 1.642641  |
| 26 | 6 | 0 | -3.250628 | 0.657788  | 0.942573  |
| 27 | 1 | 0 | -2.810874 | 1.071841  | 1.844489  |
| 28 | 6 | 0 | 0.649649  | -0.468790 | -2.578016 |
| 29 | 1 | 0 | 0.423316  | 0.438471  | -3.148194 |
| 30 | 1 | 0 | 0.796278  | -1.280837 | -3.303116 |
| 31 | 6 | 0 | 1.932078  | -0.199041 | -1.813175 |
| 32 | 6 | 0 | 3.175829  | -0.626038 | -2.273898 |
| 33 | 1 | 0 | 3.244781  | -1.244035 | -3.163353 |
| 34 | 6 | 0 | 4.323380  | -0.235441 | -1.580770 |
| 35 | 1 | 0 | 5.303446  | -0.554353 | -1.921192 |
| 36 | 6 | 0 | 4.192635  | 0.575277  | -0.453867 |
| 37 | 1 | 0 | 5.058980  | 0.912979  | 0.103916  |
| 38 | 6 | 0 | 2.912508  | 0.951611  | -0.053040 |
| 39 | 1 | 0 | 2.747035  | 1.594197  | 0.806952  |
| 40 | 7 | 0 | -0.502669 | -0.729875 | -1.688164 |
| 41 | 7 | 0 | 0.192225  | -1.212180 | 0.940331  |
| 42 | 7 | 0 | -2.387734 | 0.387214  | -0.046909 |
| 43 | 7 | 0 | 1.809718  | 0.564774  | -0.710754 |
| 44 | 8 | 0 | -0.160699 | 0.980094  | 2.293448  |
| 45 | 1 | 0 | -0.404686 | 2.329110  | -0.129216 |
| 46 | 1 | 0 | 0.226386  | 1.882349  | 2.302615  |
| 47 | 6 | 0 | 0.711517  | 3.673181  | 0.478105  |
| 48 | 8 | 0 | 1.034562  | 3.287024  | 1.569988  |
| 49 | 8 | 0 | 0.691141  | 4.393666  | -0.450003 |

-----  
**TS-HCOOH'** : E(opt)= -1656.51850825 hartree

| Center<br>Number | Atomic<br>Number | Atomic<br>Type | Coordinates (Angstroms) |           |           |
|------------------|------------------|----------------|-------------------------|-----------|-----------|
|                  |                  |                | X                       | Y         | Z         |
| 1                | 27               | 0              | 0.375441                | -0.232141 | 0.145115  |
| 2                | 6                | 0              | 2.394687                | 2.082291  | 0.167360  |
| 3                | 1                | 0              | 2.612056                | 3.030922  | 0.674937  |
| 4                | 1                | 0              | 3.341874                | 1.730318  | -0.255607 |
| 5                | 6                | 0              | 1.445843                | 2.318742  | -0.996611 |
| 6                | 6                | 0              | 1.480436                | 3.467977  | -1.783277 |
| 7                | 1                | 0              | 2.165942                | 4.276161  | -1.549818 |
| 8                | 6                | 0              | 0.617431                | 3.550666  | -2.879295 |
| 9                | 1                | 0              | 0.628838                | 4.430659  | -3.514693 |
| 10               | 6                | 0              | -0.261247               | 2.502419  | -3.152701 |
| 11               | 1                | 0              | -0.942627               | 2.546758  | -3.996153 |
| 12               | 6                | 0              | -0.252975               | 1.395423  | -2.303341 |
| 13               | 6                | 0              | -1.224443               | 0.243044  | -2.440105 |
| 14               | 1                | 0              | -2.217268               | 0.572971  | -2.100968 |
| 15               | 1                | 0              | -1.313095               | -0.051938 | -3.495146 |
| 16               | 6                | 0              | 1.202840                | 1.643126  | 2.293925  |
| 17               | 1                | 0              | 1.081735                | 0.839927  | 3.027379  |
| 18               | 1                | 0              | 1.782177                | 2.451828  | 2.760310  |
| 19               | 6                | 0              | -0.183398               | 2.126326  | 1.919665  |
| 20               | 6                | 0              | -0.723652               | 3.314355  | 2.409547  |
| 21               | 1                | 0              | -0.128770               | 3.959163  | 3.048244  |
| 22               | 6                | 0              | -2.034929               | 3.651814  | 2.069690  |
| 23               | 1                | 0              | -2.477358               | 4.570902  | 2.440966  |
| 24               | 6                | 0              | -2.765075               | 2.793150  | 1.248469  |
| 25               | 1                | 0              | -3.787578               | 3.015984  | 0.963893  |
| 26               | 6                | 0              | -2.151662               | 1.627176  | 0.796970  |
| 27               | 1                | 0              | -2.668588               | 0.907649  | 0.170150  |
| 28               | 6                | 0              | 2.981618                | 0.116716  | 1.533060  |
| 29               | 1                | 0              | 2.579891                | -0.493824 | 2.347107  |
| 30               | 1                | 0              | 3.877457                | 0.635594  | 1.901670  |
| 31               | 6                | 0              | 3.331697                | -0.803368 | 0.381832  |
| 32               | 6                | 0              | 4.620033                | -1.299204 | 0.186689  |
| 33               | 1                | 0              | 5.423857                | -0.998859 | 0.851211  |
| 34               | 6                | 0              | 4.851521                | -2.182561 | -0.868353 |
| 35               | 1                | 0              | 5.844646                | -2.586723 | -1.037060 |
| 36               | 6                | 0              | 3.791961                | -2.527244 | -1.707291 |
| 37               | 1                | 0              | 3.930304                | -3.201744 | -2.545009 |
| 38               | 6                | 0              | 2.537884                | -1.978769 | -1.450210 |
| 39               | 1                | 0              | 1.678044                | -2.198487 | -2.073184 |
| 40               | 7                | 0              | 1.914371                | 1.061625  | 1.132305  |

|    |   |   |           |           |           |
|----|---|---|-----------|-----------|-----------|
| 41 | 7 | 0 | 0.593339  | 1.323291  | -1.271628 |
| 42 | 7 | 0 | -0.893373 | 1.302614  | 1.124681  |
| 43 | 7 | 0 | 2.309577  | -1.145958 | -0.425391 |
| 44 | 8 | 0 | -0.787116 | -0.861267 | -1.654027 |
| 45 | 1 | 0 | 0.085961  | -1.487586 | 1.164030  |
| 46 | 7 | 0 | -2.896707 | -1.676703 | -0.785966 |
| 47 | 6 | 0 | -1.774538 | -1.990553 | -1.621539 |
| 48 | 6 | 0 | -3.031702 | -2.360808 | 0.523723  |
| 49 | 6 | 0 | -4.172561 | -1.556433 | -1.518997 |
| 50 | 6 | 0 | -0.939209 | -3.219158 | -1.293582 |
| 51 | 1 | 0 | -0.222234 | -3.387325 | -2.100110 |
| 52 | 1 | 0 | -1.582477 | -4.100142 | -1.224112 |
| 53 | 1 | 0 | -0.393753 | -3.098754 | -0.355333 |
| 54 | 6 | 0 | -3.119972 | -1.431434 | 1.735092  |
| 55 | 1 | 0 | -3.274545 | -2.031523 | 2.637533  |
| 56 | 1 | 0 | -3.940435 | -0.713647 | 1.660062  |
| 57 | 1 | 0 | -2.184525 | -0.883018 | 1.856293  |
| 58 | 6 | 0 | -5.220456 | -0.693013 | -0.819059 |
| 59 | 1 | 0 | -4.836201 | 0.313570  | -0.621080 |
| 60 | 1 | 0 | -5.542803 | -1.127976 | 0.129709  |
| 61 | 1 | 0 | -6.105412 | -0.601147 | -1.456127 |
| 62 | 1 | 0 | -3.957887 | -1.115200 | -2.498092 |
| 63 | 1 | 0 | -4.603768 | -2.554548 | -1.710207 |
| 64 | 1 | 0 | -2.120004 | -2.069134 | -2.658626 |
| 65 | 1 | 0 | -3.918401 | -3.009868 | 0.484932  |
| 66 | 1 | 0 | -2.178595 | -3.014730 | 0.691175  |
| 67 | 6 | 0 | 0.171140  | -2.286991 | 2.690645  |
| 68 | 8 | 0 | -0.379030 | -3.305069 | 2.428808  |
| 69 | 8 | 0 | 0.742215  | -1.504242 | 3.389191  |

-----  
**H<sub>2</sub>** : E(opt)= -1.1785394 hartree

| Center<br>Number | Atomic<br>Number | Forces (Hartrees/Bohr) |             |              |
|------------------|------------------|------------------------|-------------|--------------|
|                  |                  | X                      | Y           | Z            |
| 1                | 1                | 0.000000000            | 0.000000000 | -0.000000256 |
| 2                | 1                | 0.000000000            | 0.000000000 | 0.000000256  |

-----  
**H<sub>2</sub>O** : E(opt)= -76.418168 hartree

| Center<br>Number | Atomic<br>Number | Atomic<br>Type | Coordinates (Angstroms) |          |          |
|------------------|------------------|----------------|-------------------------|----------|----------|
|                  |                  |                | X                       | Y        | Z        |
| 1                | 8                | 0              | 0.000000                | 0.000000 | 0.118840 |

|   |   |   |          |           |           |
|---|---|---|----------|-----------|-----------|
| 2 | 1 | 0 | 0.000000 | 0.760114  | -0.475358 |
| 3 | 1 | 0 | 0.000000 | -0.760114 | -0.475358 |

-----  
**CO** : E(opt)= -113.3069132 hartree

| Center<br>Number | Atomic<br>Number | Atomic<br>Type | Coordinates (Angstroms) |          |           |
|------------------|------------------|----------------|-------------------------|----------|-----------|
|                  |                  |                | X                       | Y        | Z         |
| 1                | 6                | 0              | 0.000000                | 0.000000 | -0.650135 |
| 2                | 8                | 0              | 0.000000                | 0.000000 | 0.487601  |

-----  
**CO<sub>2</sub>** : E(opt)= -188.5777595 hartree

| Center<br>Number | Atomic<br>Number | Atomic<br>Type | Coordinates (Angstroms) |          |           |
|------------------|------------------|----------------|-------------------------|----------|-----------|
|                  |                  |                | X                       | Y        | Z         |
| 1                | 6                | 0              | 0.000000                | 0.000000 | 0.000000  |
| 2                | 8                | 0              | 0.000000                | 0.000000 | 1.169716  |
| 3                | 8                | 0              | 0.000000                | 0.000000 | -1.169716 |

-----  
**HCOOH** : E(opt)= -189.751402937 hartree

| Center<br>Number | Atomic<br>Number | Atomic<br>Type | Coordinates (Angstroms) |           |           |
|------------------|------------------|----------------|-------------------------|-----------|-----------|
|                  |                  |                | X                       | Y         | Z         |
| 1                | 6                | 0              | 0.130942                | 0.362442  | -0.000002 |
| 2                | 8                | 0              | 1.178812                | -0.219748 | 0.000000  |
| 3                | 1                | 0              | 0.037621                | 1.467566  | 0.000005  |
| 4                | 8                | 0              | -1.059257               | -0.281248 | 0.000001  |
| 5                | 1                | 0              | -1.779714               | 0.365755  | -0.000002 |

-----  
**HCOO'** : E(opt)= -189.174974174 hartree

| Center<br>Number | Atomic<br>Number | Atomic<br>Type | Coordinates (Angstroms) |           |           |
|------------------|------------------|----------------|-------------------------|-----------|-----------|
|                  |                  |                | X                       | Y         | Z         |
| 1                | 6                | 0              | 0.000047                | 0.310939  | 0.000095  |
| 2                | 8                | 0              | -1.142138               | -0.208219 | -0.000037 |
| 3                | 1                | 0              | -0.000400               | 1.465409  | -0.000005 |
| 4                | 8                | 0              | 1.142152                | -0.208162 | -0.000033 |

-----  
**Et<sub>3</sub>N** : E(opt)= -292.446843802 hartree

| Center | Atomic | Atomic | Coordinates (Angstroms) |  |  |
|--------|--------|--------|-------------------------|--|--|
|--------|--------|--------|-------------------------|--|--|

| Number | Number | Type | X         | Y         | Z         |
|--------|--------|------|-----------|-----------|-----------|
| 1      | 7      | 0    | 0.000018  | -0.000076 | 0.028323  |
| 2      | 6      | 0    | -1.117780 | -0.851224 | 0.452735  |
| 3      | 6      | 0    | 1.296005  | -0.542433 | 0.452855  |
| 4      | 6      | 0    | -0.178290 | 1.393521  | 0.452733  |
| 5      | 6      | 0    | -2.347100 | -0.701783 | -0.445755 |
| 6      | 1      | 0    | -3.147713 | -1.373142 | -0.116908 |
| 7      | 1      | 0    | -2.086942 | -0.944041 | -1.480308 |
| 8      | 1      | 0    | -2.745811 | 0.317626  | -0.431376 |
| 9      | 6      | 0    | 1.781461  | -1.681502 | -0.445808 |
| 10     | 1      | 0    | 2.763473  | -2.038744 | -0.117381 |
| 11     | 1      | 0    | 1.860618  | -1.334920 | -1.480358 |
| 12     | 1      | 0    | 1.098387  | -2.536796 | -0.431174 |
| 13     | 6      | 0    | 0.565713  | 2.383418  | -0.445712 |
| 14     | 1      | 0    | 0.225881  | 2.279236  | -1.480279 |
| 15     | 1      | 0    | 1.647919  | 2.219146  | -0.431322 |
| 16     | 1      | 0    | 0.384472  | 3.412432  | -0.116846 |
| 17     | 1      | 0    | -1.246258 | 1.628636  | 0.410730  |
| 18     | 1      | 0    | 0.122666  | 1.534131  | 1.509531  |
| 19     | 1      | 0    | -0.787535 | -1.893704 | 0.410873  |
| 20     | 1      | 0    | -1.390050 | -0.660736 | 1.509508  |
| 21     | 1      | 0    | 2.033519  | 0.264961  | 0.411161  |
| 22     | 1      | 0    | 1.267194  | -0.873527 | 1.509604  |

Et<sub>3</sub>N<sup>+</sup> : E(opt)=-292.188676170 hartree

|    |   |   |           |           |           |
|----|---|---|-----------|-----------|-----------|
| 1  | 7 | 0 | -0.000175 | -0.000045 | -0.632887 |
| 2  | 6 | 0 | -1.456029 | -0.079211 | -0.613512 |
| 3  | 6 | 0 | 0.659192  | 1.300398  | -0.613765 |
| 4  | 6 | 0 | 0.796294  | -1.221279 | -0.613510 |
| 5  | 6 | 0 | -1.987896 | -0.654460 | 0.716108  |
| 6  | 1 | 0 | -3.078524 | -0.684810 | 0.656097  |
| 7  | 1 | 0 | -1.701700 | -0.022192 | 1.559105  |
| 8  | 1 | 0 | -1.628923 | -1.671333 | 0.890205  |
| 9  | 6 | 0 | 0.427319  | 2.048704  | 0.715888  |
| 10 | 1 | 0 | 0.946378  | 3.008360  | 0.655680  |
| 11 | 1 | 0 | 0.831954  | 1.484782  | 1.558836  |
| 12 | 1 | 0 | -0.632748 | 2.246318  | 0.890245  |
| 13 | 6 | 0 | 1.561182  | -1.394113 | 0.715705  |
| 14 | 1 | 0 | 0.871095  | -1.462879 | 1.559118  |
| 15 | 1 | 0 | 2.262062  | -0.574522 | 0.889549  |
| 16 | 1 | 0 | 2.133184  | -2.323165 | 0.655172  |
| 17 | 1 | 0 | 0.129978  | -2.066268 | -0.795861 |

|    |   |   |           |           |           |
|----|---|---|-----------|-----------|-----------|
| 18 | 1 | 0 | 1.508947  | -1.150465 | -1.445579 |
| 19 | 1 | 0 | -1.854711 | 0.920199  | -0.796400 |
| 20 | 1 | 0 | -1.751068 | -0.732258 | -1.445200 |
| 21 | 1 | 0 | 1.724002  | 1.145918  | -0.796890 |
| 22 | 1 | 0 | 0.240932  | 1.882396  | -1.445351 |

-----  
**Et<sub>2</sub>N<sup>•</sup>CHCH<sub>3</sub>** : E(opt)= -291.790620717 hartree  
 -----

| Center<br>Number | Atomic<br>Number | Atomic<br>Type | Coordinates (Angstroms) |           |           |
|------------------|------------------|----------------|-------------------------|-----------|-----------|
|                  |                  |                | X                       | Y         | Z         |
| 1                | 7                | 0              | 0.055750                | -0.103434 | -0.239181 |
| 2                | 6                | 0              | 1.115240                | -1.014564 | -0.261417 |
| 3                | 6                | 0              | -1.258161               | -0.624074 | -0.617716 |
| 4                | 6                | 0              | 0.290222                | 1.314833  | -0.497216 |
| 5                | 6                | 0              | 2.433512                | -0.674163 | 0.363136  |
| 6                | 1                | 0              | 3.072691                | -1.561831 | 0.376905  |
| 7                | 1                | 0              | 2.336268                | -0.318627 | 1.404336  |
| 8                | 1                | 0              | 2.988238                | 0.103166  | -0.181621 |
| 9                | 6                | 0              | -1.985657               | -1.285315 | 0.556538  |
| 10               | 1                | 0              | -2.951662               | -1.692955 | 0.238340  |
| 11               | 1                | 0              | -2.157867               | -0.561225 | 1.358819  |
| 12               | 1                | 0              | -1.388602               | -2.104997 | 0.968017  |
| 13               | 6                | 0              | -0.493373               | 2.219858  | 0.457968  |
| 14               | 1                | 0              | -0.205058               | 2.018788  | 1.494180  |
| 15               | 1                | 0              | -1.573039               | 2.058045  | 0.372693  |
| 16               | 1                | 0              | -0.297018               | 3.274661  | 0.236690  |
| 17               | 1                | 0              | 1.357279                | 1.514679  | -0.382622 |
| 18               | 1                | 0              | 0.039006                | 1.564666  | -1.542602 |
| 19               | 1                | 0              | 0.791595                | -2.050949 | -0.226015 |
| 20               | 1                | 0              | -1.863040               | 0.202534  | -1.004794 |
| 21               | 1                | 0              | -1.149751               | -1.341370 | -1.445814 |

-----  
**Et<sub>2</sub>N<sup>+</sup>=CHCH<sub>3</sub>** : E(opt)= -291.620577211 hartree  
 -----

| Center<br>Number | Atomic<br>Number | Atomic<br>Type | Coordinates (Angstroms) |           |           |
|------------------|------------------|----------------|-------------------------|-----------|-----------|
|                  |                  |                | X                       | Y         | Z         |
| 1                | 7                | 0              | 0.001888                | -0.383097 | 0.308686  |
| 2                | 6                | 0              | 0.986775                | -1.086670 | -0.138057 |
| 3                | 6                | 0              | 0.156396                | 1.029719  | 0.777115  |
| 4                | 6                | 0              | -1.374719               | -0.959440 | 0.380488  |
| 5                | 6                | 0              | 2.404655                | -0.672822 | -0.254058 |
| 6                | 1                | 0              | 3.029386                | -1.433432 | 0.229354  |

|    |   |   |           |           |           |
|----|---|---|-----------|-----------|-----------|
| 7  | 1 | 0 | 2.632015  | 0.306807  | 0.161994  |
| 8  | 1 | 0 | 2.683630  | -0.685297 | -1.316221 |
| 9  | 6 | 0 | 0.280061  | 2.021255  | -0.381048 |
| 10 | 1 | 0 | 0.367776  | 3.029941  | 0.030828  |
| 11 | 1 | 0 | -0.597586 | 1.993126  | -1.029587 |
| 12 | 1 | 0 | 1.166434  | 1.827161  | -0.989796 |
| 13 | 6 | 0 | -2.364994 | -0.239438 | -0.531988 |
| 14 | 1 | 0 | -2.039985 | -0.272346 | -1.575257 |
| 15 | 1 | 0 | -2.518921 | 0.801380  | -0.237894 |
| 16 | 1 | 0 | -3.330088 | -0.747506 | -0.459121 |
| 17 | 1 | 0 | -1.298474 | -2.017134 | 0.119382  |
| 18 | 1 | 0 | -1.678959 | -0.892899 | 1.429560  |
| 19 | 1 | 0 | 0.738462  | -2.096888 | -0.461507 |
| 20 | 1 | 0 | -0.722189 | 1.245853  | 1.386417  |
| 21 | 1 | 0 | 1.026240  | 1.067289  | 1.436328  |

-----  
**Et<sub>2</sub>NCH=CH<sub>3</sub>** : E(opt)= -291.219117936 hartree  
 -----

| Center<br>Number | Atomic<br>Number | Atomic<br>Type | Coordinates (Angstroms) |           |           |
|------------------|------------------|----------------|-------------------------|-----------|-----------|
|                  |                  |                | X                       | Y         | Z         |
| 1                | 7                | 0              | -0.020874               | -0.262683 | 0.545426  |
| 2                | 6                | 0              | 0.769293                | -1.251005 | -0.011590 |
| 3                | 6                | 0              | 0.522135                | 1.073402  | 0.742125  |
| 4                | 6                | 0              | -1.462948               | -0.467783 | 0.595196  |
| 5                | 6                | 0              | 2.062361                | -1.182949 | -0.380515 |
| 6                | 1                | 0              | 2.560272                | -2.076268 | -0.736666 |
| 7                | 1                | 0              | 2.653205                | -0.276259 | -0.325409 |
| 8                | 6                | 0              | 0.642586                | 1.928425  | -0.530315 |
| 9                | 1                | 0              | 1.173414                | 2.862097  | -0.313840 |
| 10               | 1                | 0              | -0.341384               | 2.185825  | -0.932161 |
| 11               | 1                | 0              | 1.194468                | 1.390435  | -1.305317 |
| 12               | 6                | 0              | -2.206190               | -0.228655 | -0.727864 |
| 13               | 1                | 0              | -1.785043               | -0.855719 | -1.520270 |
| 14               | 1                | 0              | -2.130147               | 0.814047  | -1.048222 |
| 15               | 1                | 0              | -3.268900               | -0.474921 | -0.622738 |
| 16               | 1                | 0              | -1.647299               | -1.497478 | 0.928282  |
| 17               | 1                | 0              | -1.871037               | 0.185565  | 1.375428  |
| 18               | 1                | 0              | 0.241652                | -2.197926 | -0.119497 |
| 19               | 1                | 0              | -0.108505               | 1.587209  | 1.477035  |
| 20               | 1                | 0              | 1.511996                | 0.963562  | 1.203180  |

-----  
**(2) References**

1. A. D. Becke, *J. Chem. Phys.*, 1993, **98**, 5648.



2. G. W. T. M. J. Frisch, H. B. Schlegel, G. E. Scuseria, M. A. Robb, J. R. Cheeseman, G. Scalmani, V. Barone, B. Mennucci, G. A. Petersson, H. Nakatsuji, M. Caricato, X. Li, H. P. Hratchian, A. F. Izmaylov, J. Bloino, G. Zheng, J. L. Sonnenberg, M. Hada, M. Ehara, K. Toyota, R. Fukuda, J. Hasegawa, M. Ishida, T. Nakajima, Y. Honda, O. Kitao, H. Nakai, T. Vreven, J. A. Montgomery, Jr., J. E. Peralta, F. Ogliaro, M. Bearpark, J. J. Heyd, E. Brothers, K. N. Kudin, V. N. Staroverov, T. Keith, R. Kobayashi, J. Normand, K. Raghavachari, A. Rendell, J. C. Burant, S. S. Iyengar, J. Tomasi, M. Cossi, N. Rega, J. M. Millam, M. Klene, J. E. Knox, J. B. Cross, V. Bakken, C. Adamo, J. Jaramillo, R. Gomperts, R. E. Stratmann, O. Yazyev, A. J. Austin, R. Cammi, C. Pomelli, J. W. Ochterski, R. L. Martin, K. Morokuma, V. G. Zakrzewski, G. A. Voth, P. Salvador, J. J. Dannenberg, S. Dapprich, A. D. Daniels, O. Farkas, J. B. Foresman, J. V. Ortiz, J. Cioslowski and D. J. Fox, Gaussian, Inc., and Wallingford CT, *Gaussian 09, Revision D.01*, 2013
3. D. Andrae, U. H/iuBermann, H. S. M. Dolg and H. PreuB, *Theor. Chim. Acta*, 1990, **77**, 123.
4. A. V. Marenich, C. J. Cramer and D. G. Truhlar, *J. Phys. Chem. B*, 2009, **113**, 6378.
5. R.-Z. Liao, M. Wang, L. Sun and P. E. M. Siegbahn, *Dalton Trans.*, 2015, **44**, 9736.
6. K. Ye, Y.-Y. Li and R.-Z. Liao, *RSC Adv.*, 2016, **6**, 90035.
7. J. K. Nganga, C. R. Samanamu, J. M. Tanski, C. Pacheco, C. Saucedo, V. S. Batista, K. A. Grice, M. Z. Ertem and A. M. Angeles-Boza, *Inorg Chem*, 2017, **56**, 3214.
8. G. J. Tawa, I. A. Topol, S. K. Burt, R. A. Caldwell and A. A. Rashin, *The Journal of Chemical Physics*, 1998, **109**, 4852.
9. R.-Z. Liao and P. E. M. Siegbahn, *Journal of Catalysis*, 2017, **354**, 169.
10. L. B. Flamigni, A.; Sabatini, C.; Ventura, B.; Barigelletti, F. , *Top. Curr. Chem.* , 2007, **281**.
11. H.-W. Shih, M. N. V. Wal, R. L. Grange and D. W. C. MacMillan, *J. AM. CHEM. SOC.*, 2010, **132**, 13600.
12. J. J. Devery Iii, J. J. Douglas, J. D. Nguyen, K. P. Cole, R. A. Flowers Ii and C. R. J. Stephenson, *Chem Sci*, 2015, **6**, 537.
